# Supplementary material for: Novel Circulating Tumour Cell-Related Risk Model Indicates Prognosis and Immune Infiltration in Lung Adenocarcinoma
Source: J Immunol Res. 2022 May 29;2022:6521290. doi: 10.1155/2022/6521290 (PMC9168189; doi:10.1155/2022/6521290)
Supplement: Supplementary Materials — The following are the supplementary material to this article: Supplementary Data 1: Data for Figure 3(f) heat map. Supplementary Data 2: Data for Figure 6(a) volcano plot. Supplementary Data 3: Data for Figure 6(b), S6 GO and KEGG. Supplementary Data 4: Data for Figure 6(c) circle diagram. Supplementary Figures: Supplementary Figure S1: The cluster tree shows the similarity between 22 DEGs. Supplementary Figure S2: KM curve displays the survival possibility for the 4 candidate genes' low and high expression groups. Supplementary Figure S3: ROC curve considered risk score and other prognostic factors in TCGA-LUAD data. Supplementary Figure S4: Unsupervised clustering of 4 DEGs expressions in GSE72094 (A) and GSE42127 (B), while the tumor stage, smoking history, and risk score are used as patient annotations. Supplementary Figure S5: Validation of the CTCR Model in the GSE42127 dataset (n = 132). Supplementary Figure S6: Bar chart derived from KEGG analysis. Supplementary Figure S7: The immune cell infiltration landscape in GSE42127 dataset (n = 132). [file 6521290.f1.zip]

Archive with 5 entries (5 files):
- Supplementary Data 1_data for heat map.txt
- Supplementary Data 2_data for volcano plot.txt
- Supplementary Data 3_data for GO and KEGG.txt
- Supplementary Data 4_data for circle diagram.txt
- Supplementary Figures.docx
