# Supplementary material for: Novel Circulating Tumour Cell-Related Risk Model Indicates Prognosis and Immune Infiltration in Lung Adenocarcinoma
Source: J Immunol Res. 2022 May 29;2022:6521290. doi: 10.1155/2022/6521290 (PMC9168189; doi:10.1155/2022/6521290)
Supplement: Supplementary Materials — The following are the supplementary material to this article: Supplementary Data 1: Data for Figure 3(f) heat map. Supplementary Data 2: Data for Figure 6(a) volcano plot. Supplementary Data 3: Data for Figure 6(b), S6 GO and KEGG. Supplementary Data 4: Data for Figure 6(c) circle diagram. Supplementary Figures: Supplementary Figure S1: The cluster tree shows the similarity between 22 DEGs. Supplementary Figure S2: KM curve displays the survival possibility for the 4 candidate genes' low and high expression groups. Supplementary Figure S3: ROC curve considered risk score and other prognostic factors in TCGA-LUAD data. Supplementary Figure S4: Unsupervised clustering of 4 DEGs expressions in GSE72094 (A) and GSE42127 (B), while the tumor stage, smoking history, and risk score are used as patient annotations. Supplementary Figure S5: Validation of the CTCR Model in the GSE42127 dataset (n = 132). Supplementary Figure S6: Bar chart derived from KEGG analysis. Supplementary Figure S7: The immune cell infiltration landscape in GSE42127 dataset (n = 132). [file 6521290.f1.zip › Supplementary Data 1_data for heat map.txt]

ID	TCGA-05-4389-01A-01R-1206-07	TCGA-05-4395-01A-01R-1206-07	TCGA-05-4402-01A-01R-1206-07	TCGA-05-4403-01A-01R-1206-07	TCGA-05-4410-01A-21R-1858-07	TCGA-05-4415-01A-22R-1858-07	TCGA-05-4420-01A-01R-1206-07	TCGA-05-4422-01A-01R-1206-07	TCGA-05-4424-01A-22R-1858-07	TCGA-05-4426-01A-01R-1206-07	TCGA-05-4427-01A-21R-1858-07	TCGA-05-4432-01A-01R-1206-07	TCGA-05-4433-01A-22R-1858-07	TCGA-05-5420-01A-01R-1628-07	TCGA-05-5423-01A-01R-1628-07	TCGA-35-3615-01A-01R-0946-07	TCGA-35-5375-01A-01R-1628-07	TCGA-38-4625-01A-01R-1206-07	TCGA-38-4630-01A-01R-1206-07	TCGA-38-4631-01A-01R-1755-07	TCGA-44-2656-01A-02R-0946-07	TCGA-44-2656-01A-02R-A278-07	TCGA-44-2656-01B-06R-A277-07	TCGA-44-2657-01A-01R-1107-07	TCGA-44-2662-01A-01R-A278-07	TCGA-44-2662-01B-02R-A277-07	TCGA-44-2666-01B-02R-A277-07	TCGA-44-3917-01A-01R-A278-07	TCGA-44-3917-01B-02R-A277-07	TCGA-44-3919-01A-02R-1107-07	TCGA-44-4112-01A-01R-1107-07	TCGA-44-4112-01B-06R-A277-07	TCGA-44-5643-01A-01R-1628-07	TCGA-44-6145-01A-11R-1755-07	TCGA-44-6146-01A-11R-1755-07	TCGA-44-6146-01A-11R-A278-07	TCGA-44-6146-01B-04R-A277-07	TCGA-44-6147-01A-11R-1755-07	TCGA-44-6147-01A-11R-A278-07	TCGA-44-6147-01B-06R-A277-07	TCGA-44-6777-01A-11R-1858-07	TCGA-44-7659-01A-11R-2066-07	TCGA-44-7660-01A-11R-2066-07	TCGA-44-7661-01A-11R-2066-07	TCGA-44-7662-01A-11R-2066-07	TCGA-44-7667-01A-31R-2066-07	TCGA-44-7672-01A-11R-2066-07	TCGA-44-8120-01A-11R-2241-07	TCGA-44-A47A-01A-21R-A24H-07
EPYC	0.130728049	0.191056232	0.66003933	0.035340876	0.898031624	0	0.053809168	0.275177126	0.273804755	0.090137359	0.155447899	0.174614554	0	0.741902896	0.098420831	2.648316172	1.220171544	1.054872227	0.694756237	0.246470693	0.299203468	0.680305864	0.235634038	0.231079743	0.304460435	1.149812479	0	1.432536023	0.561223499	0.779684643	0.437288235	0.315179141	0.052825856	1.666186692	0	0	0.079813568	0.871211908	0.646427819	0.152734729	3.391599105	0	2.019228656	0.298981288	5.294486939	0.176404073	0.491239678	0.139889903	0.406055672
RAB26	3.359935944	0.208614914	1.308961974	1.009245967	0.801422185	2.911047724	6.673897545	0.808949042	3.066341449	1.022067056	0.783387967	5.811530272	2.531612312	3.775514657	2.769316706	0.648050166	0.871125264	1.834204694	0.335979598	2.070170317	0.820941545	0.82536462	0.197915048	0.582269339	2.450689265	1.053552955	0.423216969	1.983692966	1.152276777	2.408257539	0.89198893	1.005962648	1.286723803	1.781147159	0.261662447	0.40862623	0	2.996703327	1.764591528	0.320714501	2.128332157	0.502795752	0.229189423	2.209873792	1.733912207	0.716137057	2.829289748	0.6814832	4.092678386
MMP7	74.04987083	63.96843116	280.1206268	151.8142803	72.8309736	5.033347297	1.79784698	9.300998693	26.3809644	19.2604097	5.676893015	32.93575879	38.75758206	55.68000869	37.54883927	19.02226401	33.42012041	60.86971486	131.7032031	24.81980039	105.098642	82.73665141	21.42159891	50.33436729	467.8754447	173.6480977	67.9770849	2.647369104	1.889669881	61.54006398	155.3272765	43.68982593	14.48936151	48.80430114	6.929056446	4.649631751	12.09314707	148.9595916	122.88341	22.84528225	14.50937714	500.810607	62.80103942	157.5541295	34.7792906	2.261624758	390.7874422	9.478308741	23.41787754
FOS	33.28857753	287.9093807	74.13874444	353.5652218	281.7759693	222.1119075	83.3076035	80.3792554	165.9093616	148.2646472	188.0665934	47.37909494	315.4133108	37.5130936	241.8679005	140.4563082	70.3301904	85.78031127	50.47639367	89.55297222	276.3357479	125.3430834	97.06950736	322.485234	53.1079968	152.3724279	300.6130844	20.13658563	67.40180211	144.563427	194.5926856	160.9360372	90.7274295	190.8551255	397.1614923	312.8264103	231.2223471	184.1541819	105.9058587	216.9389747	118.6311432	103.4458005	21.24958971	193.2147184	100.8205595	39.51435806	38.93716328	232.740984	120.7969643
[truncated: 398 more columns]
