# Supplementary material for: Novel Circulating Tumour Cell-Related Risk Model Indicates Prognosis and Immune Infiltration in Lung Adenocarcinoma
Source: J Immunol Res. 2022 May 29;2022:6521290. doi: 10.1155/2022/6521290 (PMC9168189; doi:10.1155/2022/6521290)
Supplement: Supplementary Materials — The following are the supplementary material to this article: Supplementary Data 1: Data for Figure 3(f) heat map. Supplementary Data 2: Data for Figure 6(a) volcano plot. Supplementary Data 3: Data for Figure 6(b), S6 GO and KEGG. Supplementary Data 4: Data for Figure 6(c) circle diagram. Supplementary Figures: Supplementary Figure S1: The cluster tree shows the similarity between 22 DEGs. Supplementary Figure S2: KM curve displays the survival possibility for the 4 candidate genes' low and high expression groups. Supplementary Figure S3: ROC curve considered risk score and other prognostic factors in TCGA-LUAD data. Supplementary Figure S4: Unsupervised clustering of 4 DEGs expressions in GSE72094 (A) and GSE42127 (B), while the tumor stage, smoking history, and risk score are used as patient annotations. Supplementary Figure S5: Validation of the CTCR Model in the GSE42127 dataset (n = 132). Supplementary Figure S6: Bar chart derived from KEGG analysis. Supplementary Figure S7: The immune cell infiltration landscape in GSE42127 dataset (n = 132). [file 6521290.f1.zip › Supplementary Data 2_data for volcano plot.txt]

gene_name	log2FoldChange	pvalue	padj
TSPAN6	0.068126978	0.298713109	0.471510074
TNMD	1.200606454	3.55126E-05	0.000538323
DPM1	0.040898449	0.408219437	0.580351555
SCYL3	-0.070433439	0.093118044	0.208447006
C1orf112	0.095831874	0.128673752	0.262882363
FGR	0.434769389	4.76357E-07	1.71359E-05
CFH	0.146082406	0.131556801	0.267059548
FUCA2	0.125164366	0.024515518	0.079427646
GCLC	-0.472421289	0.000795112	0.006059031
NFYA	-0.029246221	0.552126666	0.701993417
STPG1	-0.098936991	0.063786435	0.158965463
NIPAL3	-0.175805201	0.002688595	0.015327313
LAS1L	-0.040980048	0.304741438	0.477811041
ENPP4	-0.192160302	0.00396171	0.020490133
SEMA3F	0.223980107	0.008175223	0.035291427
CFTR	0.509882547	0.001601107	0.010356554
ANKIB1	-0.023350109	0.659496172	0.785085585
CYP51A1	0.003874894	0.958644305	0.977508422
KRIT1	-0.053024631	0.247010553	0.414962794
RAD52	-0.039921249	0.483806531	0.646688318
MYH16	-0.479673391	0.00093525	0.00688543
BAD	-0.108481319	0.08024276	0.187652265
LAP3	0.145906752	0.007192739	0.032069054
CD99	0.20046777	0.001921249	0.011881232
HS3ST1	0.434478815	3.71576E-05	0.000556665
AOC1	0.210363489	0.280583518	0.452016142
WNT16	1.069625103	4.86317E-10	5.23932E-08
HECW1	0.062039204	0.597474129	0.73822491
MAD1L1	-0.143700151	0.012554627	0.048429578
LASP1	0.0363386	0.492284618	0.653663718
SNX11	0.093231156	0.03438197	0.10174294
TMEM176A	0.608750212	5.50694E-09	4.13089E-07
M6PR	0.194079509	0.000179733	0.001940312
KLHL13	-0.105676377	0.430416719	0.600443481
CYP26B1	0.207367037	0.05430019	0.141660836
ICA1	0.039358255	0.538893857	0.691623575
DBNDD1	-0.221254467	0.005700791	0.026951283
ALS2	0.0281791	0.477469629	0.641104926
CASP10	0.056065478	0.329792965	0.503099859
CFLAR	-0.253102145	9.27816E-06	0.000186499
TFPI	0.039781454	0.735160569	0.838302619
NDUFAF7	-0.121458212	0.001535708	0.010039635
RBM5	-0.149636025	0.002396388	0.014056147
MTMR7	1.713462411	2.11006E-28	3.56448E-25
SLC7A2	0.366064139	0.031548207	0.095493002
ARF5	-0.102035194	0.092797811	0.207862371
SARM1	0.050952622	0.426261615	0.596725735
POLDIP2	-0.021294859	0.640012963	0.770716495
PLXND1	0.154210202	0.03698169	0.107186243
AK2	-0.192740871	0.000108717	0.001307695
CD38	0.084132111	0.456095768	0.623068944
FKBP4	-0.018844538	0.807630422	0.886585947
KDM1A	0.027035533	0.541286964	0.693683045
RBM6	-0.087398937	0.119456708	0.249381142
CAMKK1	0.044610655	0.526090852	0.68077794
RECQL	0.278622519	2.45292E-05	0.000401207
VPS50	-0.012107449	0.792555583	0.87672888
HSPB6	-0.21814475	0.087448572	0.199812156
ARHGAP33	-0.02827202	0.781665735	0.870041517
NDUFAB1	0.024756819	0.64169194	0.77185799
PDK4	0.088665709	0.472919915	0.637605474
SLC22A16	0.102061665	0.457109238	0.623934065
ZMYND10	-0.067366854	0.666643237	0.790439178
ABCB5	0.395069648	0.022743123	0.075173169
ARX	-0.183710619	0.361269883	0.535318567
SLC25A13	0.10116507	0.077374033	0.18287778
ST7	-0.155648272	0.002448453	0.014278247
CDC27	0.025010919	0.546794287	0.697881965
SLC4A1	-0.075599388	0.600888117	0.741084782
CALCR	0.233561148	0.154417693	0.29906301
HCCS	0.064172547	0.153794864	0.298390439
DVL2	-0.11240944	0.016481343	0.059411176
PRSS22	-0.101891023	0.33309197	0.506540639
UPF1	-0.111567468	0.022749679	0.075185964
SKAP2	-0.049162415	0.45440493	0.621713448
SLC25A5	0.077904793	0.201713749	0.359995685
MCUB	0.041187904	0.578151949	0.72265999
HOXA11	0.708883422	0.010550088	0.042542853
POLR2J	-0.15390274	0.018480991	0.064439335
DHX33	-0.040781067	0.379638495	0.552952662
MEOX1	0.251792953	0.033570446	0.099953969
THSD7A	0.548416568	3.36862E-06	8.31799E-05
LIG3	0.075370225	0.113078257	0.239599578
RPAP3	0.108759583	0.005964796	0.027890306
ACSM3	-0.146071471	0.169772515	0.319625216
REXO5	0.166900211	0.012561145	0.048437025
CIAPIN1	0.116369631	0.008122841	0.03513307
SPPL2B	0.101355263	0.132180179	0.267990079
FAM214B	0.053312974	0.314460171	0.487999738
COPZ2	0.35355921	2.92302E-05	0.000461995
PRKAR2B	0.138301745	0.17185952	0.322318645
MSL3	0.060793435	0.083179268	0.192494573
CREBBP	0.02763881	0.547241378	0.698304867
TSPOAP1	0.059160517	0.568122128	0.71466123
MPO	0.314772038	0.008591581	0.036583954
PON1	-0.318334451	0.043955625	0.121575347
GCFC2	-0.133488387	0.00419399	0.021372416
WDR54	0.067469914	0.358420859	0.53229348
CROT	-0.05996227	0.323239316	0.496527946
ABCB4	0.643337756	3.22718E-08	1.83186E-06
KMT2E	-0.148644275	0.001162271	0.008115914
RHBDD2	-0.119776506	0.027757552	0.086911102
SOX8	-0.018118382	0.897013454	0.941898011
IBTK	0.066042675	0.169041032	0.318645816
ZNF195	0.014124308	0.781786734	0.870066602
MYCBP2	0.04692558	0.481878743	0.64511659
FBXL3	-0.060528136	0.191908308	0.347886772
ITGAL	0.229257438	0.009722609	0.040094252
PDK2	-0.17929001	0.003292657	0.017825341
ITGA3	-0.395130094	1.78043E-05	0.000312256
ZFX	0.113703728	0.02837469	0.088267525
LAMP2	0.140136468	0.008767667	0.037135303
ITGA2B	-0.176920419	0.204140388	0.363153196
ASB4	-0.546752394	0.000273862	0.002702277
GDE1	-0.048199928	0.367448125	0.541170679
REX1BD	-0.056565581	0.422973916	0.593989755
CRLF1	-0.403596174	0.05786749	0.148310464
OSBPL7	-0.280991815	0.000253768	0.002550488
TMEM98	-0.076475869	0.385830974	0.559171246
YBX2	0.059472345	0.735610579	0.83870052
KRT33A	-1.210178405	0.010615503	0.042725049
MAP3K14	0.047372321	0.471851826	0.636632897
ABCC8	1.60782707	7.26067E-16	2.59858E-13
CACNG3	0.363176152	0.185497406	0.339697419
TMEM132A	0.242770205	0.011805629	0.046288675
AP2B1	-0.050920906	0.287331998	0.459018192
TAC1	4.027634986	9.41251E-27	1.24222E-23
ZNF263	0.013536383	0.682753279	0.802037119
CX3CL1	-0.061601656	0.623521292	0.7585134
SPATA20	-0.118098479	0.063712345	0.158865191
CACNA1G	0.643037568	6.74482E-06	0.000145471
TNFRSF12A	-0.261587445	0.006743852	0.030552067
DLX6	0.044743208	0.862574236	0.921300838
MAP3K9	-0.128635451	0.06267619	0.157069835
RALA	0.078225342	0.089079892	0.202194023
BAIAP2L1	-0.130449347	0.050510737	0.134491485
KDM7A	-0.050222765	0.393916256	0.566751995
ETV1	-0.089093519	0.386020596	0.559278939
AGK	-0.14657548	9.39538E-05	0.001167017
ALDH3B1	-0.594811323	1.22523E-08	8.20027E-07
TTC22	-0.263828308	0.000687844	0.005447035
PHTF2	0.037509446	0.519912972	0.676068382
CCL26	0.688322415	3.58495E-06	8.72201E-05
FARP2	0.031233093	0.532043298	0.685779541
USH1C	0.714173028	0.002367638	0.013926199
GGCT	-0.118558487	0.083313613	0.192700854
DBF4	0.106007679	0.140193553	0.2793552
TBXA2R	0.017206674	0.815644245	0.89170384
IFRD1	0.026339368	0.735177104	0.838302619
LGALS14	0.014472434	0.969927792	0.983953652
COX10	0.008220355	0.841536807	0.908997612
GTF2IRD1	-0.083725216	0.123377307	0.254889268
PAF1	-0.050614758	0.297947412	0.470653267
VPS41	-0.058875411	0.176349738	0.328030397
ARHGAP44	-0.001122081	0.990661871	0.995020623
ELAC2	-0.036182278	0.364349231	0.538277364
SCIN	0.512456977	0.00032133	0.00304611
ARSD	-0.013458414	0.862139372	0.921162525
PNPLA4	-0.110515291	0.103588629	0.224807552
MYH13	0.399757963	0.019045108	0.065884093
ADIPOR2	-0.010673151	0.846608641	0.911529194
CDKL3	-0.229670949	0.000436198	0.003852162
UPP2	0.135759199	0.353571549	0.527739657
PRSS21	0.227877469	0.244848605	0.412298496
MARK4	-0.045386387	0.348700794	0.522750511
PROM1	0.601084197	0.001997246	0.012226807
CCDC124	-0.065722993	0.312910715	0.486501687
CEACAM21	0.425915593	1.83225E-05	0.000319354
PAFAH1B1	-0.055896373	0.121347012	0.252101879
NOS2	0.630926086	7.70017E-08	3.79068E-06
DNAH9	0.623588218	0.002798779	0.01577867
KIAA0100	0.010051012	0.8299982	0.90131786
SLC13A2	2.212609187	2.49872E-15	8.30914E-13
GAS7	0.225716873	0.005753622	0.027154752
TRAPPC6A	-0.301122966	7.371E-05	0.000960426
MATK	0.259705632	0.007401659	0.032762483
CEACAM7	1.021004076	1.97121E-08	1.22604E-06
CD79B	0.071334735	0.545491991	0.69696339
SCN4A	0.300693824	0.107571989	0.230936368
ST7L	-0.180714401	9.16356E-05	0.00114428
TKTL1	-0.101170064	0.654302963	0.780976845
PAX6	-0.277914593	0.000945365	0.006942208
RPUSD1	-0.012948336	0.84389231	0.910323106
RHBDF1	-0.102088636	0.104113248	0.225528863
LUC7L	-0.080582973	0.19185678	0.347821229
CACNA2D2	-0.351577163	0.031549864	0.095493002
BAIAP3	0.019525241	0.861919314	0.921085448
TSR3	-0.074171003	0.15891855	0.305527799
PIGQ	-0.068837447	0.258006718	0.427503945
CRAMP1	-0.0513425	0.291181146	0.463501646
TEAD3	-0.14421198	0.010067616	0.041123469
SELE	0.902550198	7.7641E-12	1.32215E-09
DNAJC11	0.028089016	0.469341048	0.634618134
FMO3	0.088565639	0.401596461	0.574066537
MYLIP	-0.107046975	0.079361822	0.186107416
NOX1	0.449671218	7.68852E-07	2.53277E-05
E2F2	0.326662781	0.000365061	0.003358149
PSMB1	-0.004489295	0.93324267	0.963000084
SYN1	0.575512095	1.67921E-07	7.31853E-06
JARID2	0.030304945	0.579045598	0.723306034
CDKL5	-0.197919209	0.005725369	0.027040237
CAMK1G	0.102263351	0.197494534	0.354828093
CDK11A	-0.159287923	0.015417683	0.056589569
NADK	-0.098884436	0.035663292	0.104476426
TFAP2B	-0.439597395	0.1494594	0.292329075
TFAP2D	1.505721361	3.12404E-06	7.85323E-05
DLEC1	-0.174543339	0.223915154	0.387509108
CYTH3	-0.247421293	0.004684807	0.023234945
ADAM22	-0.102334659	0.261945242	0.432026535
SYPL1	-0.087925323	0.072084493	0.173798265
CYB561	-0.133931686	0.015347506	0.056395708
SPAG9	-0.205973406	0.000227364	0.002336829
CELSR3	-0.158807866	0.161808596	0.309001909
AASS	-0.10040838	0.313437571	0.487142668
PLEKHG6	-0.34545192	0.000467917	0.004064391
SS18L2	-0.147695667	0.003310988	0.017887892
MPND	-0.082747475	0.141067092	0.280672074
MGST1	-0.464330308	2.32734E-07	9.57974E-06
CRY1	0.209482019	1.84161E-05	0.000320457
PGLYRP1	0.228576706	0.09791367	0.216044416
NFIX	-0.073383747	0.44491646	0.613650118
ST3GAL1	0.139994548	0.131086152	0.266385833
MMP25	0.283564837	0.001490016	0.009793984
IL32	-0.058784909	0.531287167	0.685067161
PKD1	0.066120495	0.305127668	0.478114858
MAPK8IP2	0.328347588	0.013067111	0.049881907
MED24	0.010477452	0.82923271	0.900909544
RHOBTB2	-0.62734094	1.46151E-09	1.34761E-07
HEATR5B	-0.085052708	0.049114283	0.131694881
SEC62	0.002396209	0.957578819	0.976752136
RPS20	-0.224796142	0.000362311	0.003337213
CSDE1	-0.067946187	0.090247367	0.203840123
UBE3C	-0.00648551	0.878851529	0.93157115
REV3L	-0.145538187	0.054933016	0.142959968
TENM1	0.033527331	0.867907	0.924588344
PAX7	-0.509820885	0.143198526	0.283515745
MASP2	-0.189496473	0.060520151	0.153074626
IYD	-0.346416669	0.054041403	0.1411863
FAM76A	-0.142819696	0.000381788	0.003470439
TRAF3IP3	0.066658491	0.462853801	0.628661638
POMT2	0.0591291	0.232059116	0.397401589
VTA1	0.052578956	0.244101767	0.411483887
MLXIPL	0.067305609	0.627017239	0.761100025
BAZ1B	0.042787505	0.33440824	0.507792635
RANBP9	-0.178991645	2.00817E-05	0.000341971
ETV7	0.113824014	0.190160312	0.34568054
SPRTN	0.010201452	0.803500401	0.883752088
EEF1AKNMT	0.052559218	0.19626636	0.353102195
DYRK4	0.035252115	0.543883434	0.695785932
ZNF207	-0.097135026	0.004649752	0.023099439
UQCRC1	-0.128828489	0.016767021	0.060161838
STARD3NL	0.005396679	0.926276754	0.958923696
CD9	-0.250061122	0.00104697	0.007486561
HHATL	-1.12685593	7.47975E-07	2.47559E-05
NCAPD2	0.080078926	0.271136497	0.441768385
IFFO1	0.133629698	0.083515952	0.193093491
GIPR	-0.219836908	0.049534208	0.132635601
PHF7	-0.140042425	0.003422412	0.018309515
SEMA3G	0.212842181	0.013795881	0.05201568
NISCH	-0.150543658	0.002422072	0.014171369
STAB1	0.386278254	2.33462E-06	6.2088E-05
FUZ	-0.036045998	0.550444493	0.700698451
SLC6A13	-0.189603795	0.20989091	0.370234235
IDS	-0.072932791	0.303455373	0.476474934
PRSS3	0.515026445	0.016971272	0.060673134
ZNF200	0.164740716	1.93202E-05	0.000332762
CD4	0.319372834	4.6112E-05	0.000654809
LRRC23	-0.184000737	0.022829624	0.075370596
BTK	0.322712814	0.000109972	0.001316793
HFE	-0.042141162	0.497048137	0.657560165
SCMH1	-0.034958881	0.440538808	0.609976956
FYN	-0.031670382	0.640208942	0.770860778
HIVEP2	-0.005214612	0.922965813	0.956978523
FMO1	0.598936544	2.70348E-07	1.07609E-05
ELOA	-0.069079627	0.090829022	0.204810255
LYPLA2	-0.166535963	0.00333198	0.017973711
CLCN6	-0.102740082	0.059860228	0.151902668
MRC2	-0.014075322	0.862443564	0.921215204
NME1-NME2	-0.250867311	0.008494375	0.036291485
SLC6A7	0.252219574	0.025630327	0.082008373
TSPAN9	0.056640786	0.401236055	0.573667855
BTBD7	-0.072180523	0.135128327	0.272246607
APBA3	0.044589897	0.348741123	0.522750511
MKS1	-0.030009701	0.476164172	0.640079107
ABHD5	0.058782664	0.218100468	0.380392293
ANOS1	0.129272209	0.229861412	0.3948067
AKAP8L	-0.148880706	0.001180863	0.008213143
MBTD1	-0.076911675	0.135698316	0.273025788
UTP18	0.00278267	0.948344168	0.971650717
RNF216	0.015639695	0.701377283	0.814759054
TTC19	-0.198387608	4.3311E-05	0.000626193
PTBP1	0.033121291	0.363570252	0.537408522
DPF1	-0.250536487	0.039062563	0.111473085
SYT7	0.044042836	0.734759299	0.838024056
LARS2	-0.013506277	0.732369385	0.836314628
PIK3C2A	-0.032841167	0.54353142	0.695567375
PLAUR	0.087646995	0.345676404	0.519467882
ANLN	0.130916385	0.249871333	0.418382897
WIZ	0.02780781	0.581214762	0.725007734
RABGAP1	-0.10871	0.006412238	0.029377483
DCN	0.210189824	0.024887906	0.080307613
QPCTL	-0.213893592	0.000659632	0.005277056
PPP5C	-0.056099758	0.195243863	0.351754787
CEP68	-0.074248198	0.092911336	0.208094589
MAP4K3	-0.075294513	0.116037586	0.244173441
ZBTB32	-0.01039251	0.909250001	0.948884206
TYROBP	0.313450906	0.001160688	0.008108453
TMEM159	-0.053203835	0.487366059	0.649762776
GABRA3	-0.053080523	0.861932333	0.921085448
BRCA1	0.15940401	0.061068185	0.154142366
ERCC1	-0.154008564	0.001350057	0.009114711
CD22	0.152426975	0.201396936	0.359575354
SEMA3B	-0.505930523	9.0245E-05	0.001131264
MBTPS2	0.045790735	0.345857183	0.519665583
PRICKLE3	-0.078313539	0.173562721	0.324331895
LTF	0.634860423	0.000311966	0.002979409
EXTL3	0.01790284	0.760478518	0.856246282
NR1H4	0.982473502	0.00025669	0.002571288
ELOVL5	-0.01596975	0.766609496	0.860522878
ALOX5	0.428073771	1.54258E-06	4.46512E-05
KDM5D	-0.194527334	0.53255068	0.68623544
CALCOCO1	-0.049487745	0.360801787	0.534832007
UBR7	0.073971394	0.071065517	0.172049926
MAP4K5	-0.035576835	0.455037081	0.622306528
EHD3	0.228996208	0.000428588	0.003807347
PSMC4	0.157613493	0.004877391	0.023990449
MAN2B2	-0.100393233	0.049705245	0.132992392
SLC7A14	-0.277142935	0.188679475	0.343624632
CLDN11	0.515927293	1.32433E-05	0.000247583
SLC25A39	-0.054317302	0.36991518	0.54343959
MVP	-0.19020119	0.005188495	0.025151577
NUB1	-0.035272488	0.364565287	0.53840821
PGM3	0.16649408	0.001672882	0.010715783
RWDD2A	0.168030849	0.000926827	0.006840572
CLK1	-0.187883196	0.00092232	0.006809074
POLR3B	0.087861181	0.0397996	0.113152472
ANGEL1	0.058038492	0.222063507	0.385180949
RNF14	0.051965713	0.240155437	0.40697582
DNASE1L1	-0.130709717	0.015725437	0.057388914
DDX11	0.131456543	0.092556487	0.207531553
HEBP1	-0.127521153	0.008344709	0.035854486
GPRC5A	-0.362030601	0.000292268	0.002831354
MAMLD1	-0.045376396	0.660590045	0.785904523
CD6	0.138951393	0.120265644	0.250496087
TACC3	0.043638859	0.578347452	0.722770392
UFL1	-0.017876855	0.650529662	0.778541393
POLA2	0.120866551	0.027278526	0.085812044
ZC3H3	-0.042276728	0.465765692	0.631569006
CAPN1	-0.091177203	0.088392911	0.201175329
ACP3	0.002834448	0.97261849	0.98549377
MDH1	-0.019494003	0.650464857	0.778538632
SLC30A9	-0.069814058	0.095021523	0.21143071
MTMR11	0.314528277	0.000588747	0.004843945
COX15	-0.093917072	0.024385087	0.079175135
CCDC88C	0.069765237	0.285453309	0.457219881
YAF2	-0.006433425	0.908540074	0.948565251
ZMYND11	-0.053419783	0.201984483	0.360395821
WAS	0.231945702	0.003010423	0.016684541
DPEP1	0.520814837	0.000152307	0.001708886
BID	0.082524224	0.22282634	0.386076535
MATR3	-0.221141101	0.017951376	0.063103254
NPC1L1	1.774566925	1.27212E-17	5.53859E-15
XYLT2	-0.161200308	0.000789033	0.00602767
RGPD5	0.126011394	0.469630057	0.634831848
STMN4	-0.002422116	0.991140344	0.99523344
NUDCD3	0.026772223	0.539135111	0.691773278
ISL1	0.953424803	0.000775977	0.005946883
CHDH	-0.012105448	0.888497064	0.936810506
IL20RA	0.165918903	0.182824628	0.336284383
CLCA1	2.087770968	1.90554E-09	1.68641E-07
CLCA4	0.149081344	0.46039809	0.626408532
GLT8D1	-0.041284954	0.176982768	0.328860271
ATP2C1	0.148919278	0.003383177	0.018170334
IGF1	0.380324517	0.000717881	0.00562314
SLC38A5	-0.021093736	0.836400562	0.905849929
RALBP1	-0.046291261	0.3331307	0.506581295
RUFY3	-0.187154828	0.002105346	0.01273825
CNTN1	0.600194519	0.000414814	0.00371232
SLC11A1	0.411225559	1.60869E-05	0.000288362
WWTR1	-0.147215379	0.016587725	0.059690932
AGPS	-0.006389883	0.887553639	0.936395172
ZNF806	0.188641485	0.555173819	0.704335671
CXorf56	0.01651012	0.652875916	0.78002845
ATP1A2	-0.311932239	0.02078622	0.070300605
TTC27	-0.096046637	0.020473742	0.069421683
ZNF582	-0.009483971	0.894860679	0.940608199
VSIG2	-0.344688696	0.035108503	0.103342968
PHLDB1	-0.045860703	0.430820213	0.600752799
MARCO	0.722912244	6.58439E-07	2.2371E-05
CYP24A1	0.602746776	0.002574029	0.014820233
PRDM11	-0.091031677	0.129797537	0.264533439
SYT13	1.703584281	2.02571E-11	3.06631E-09
SNAI2	0.14661741	0.18420621	0.337940775
CD74	0.023933682	0.80118851	0.88210525
HGF	-0.166243754	0.120773718	0.25115795
ZRANB1	0.017853527	0.699310645	0.813378868
NCDN	-0.113150546	0.023497501	0.07698576
ADGRA2	0.244116991	0.001251159	0.008588908
CCT8L1P	0.018707134	0.920568072	0.955420906
ZFP64	0.042816554	0.310812811	0.48416182
MNAT1	-0.099011213	0.03945133	0.112362327
SAMD4A	-0.063375262	0.478328103	0.641864275
RUNX3	0.249783486	0.002902908	0.016242134
MRE11	-0.095562502	0.026493246	0.083954587
PLEKHB1	-0.134082652	0.187921304	0.342613215
SERPINB1	-0.13087812	0.084628303	0.194897071
CYP3A43	-0.032306262	0.834634617	0.904637335
SLC7A9	1.010203931	2.87391E-08	1.67408E-06
SPAST	-0.013699059	0.7680623	0.861628781
NRXN3	0.627819775	5.09331E-07	1.81214E-05
OSBPL5	0.153585785	0.067988972	0.166688746
AQR	0.008406094	0.844738619	0.910680588
CPS1	0.68031447	0.014430584	0.053832031
C8B	2.291041653	1.85889E-27	2.5324E-24
FHL1	0.152126726	0.182586962	0.336006474
RTF2	-0.031797124	0.400937263	0.573318294
GABRA1	1.151284317	0.004516513	0.022616638
NLRP2	-0.200916419	0.265159845	0.435153127
SLC45A4	-0.118236341	0.16758113	0.316798849
RNF10	0.007303207	0.835679306	0.905338123
ZNF839	-0.110885542	0.021963882	0.0732511
ZDHHC6	-0.042411219	0.244021372	0.411381205
GRAMD1B	0.200312046	0.172351616	0.322811489
RNH1	-0.086437453	0.084758898	0.195080811
NDUFS1	-0.025689397	0.549421686	0.700010803
RB1CC1	-0.086859685	0.097483973	0.215388886
ERP44	0.009231308	0.812553571	0.889700866
ALAS1	0.009977344	0.829573816	0.901141041
BIRC3	-0.109473574	0.343474928	0.5173193
AKAP11	-0.004832514	0.930955118	0.961555873
GLRX2	-0.045285383	0.403420691	0.575797175
SNAPC1	0.040311586	0.48572991	0.648417801
DERA	0.005162119	0.937694197	0.965592929
STRAP	0.124724475	0.041947798	0.11748496
ABCC2	0.430861005	0.064900168	0.160990536
DEF6	-0.027718483	0.631913035	0.765151422
PLEKHO1	0.170614452	0.01530879	0.056314777
GCLM	-0.140741623	0.162706977	0.310251086
UBR2	-0.085591042	0.041451828	0.116494285
EHD2	-0.2822604	0.000484931	0.004183783
DEPDC1	0.1796889	0.121547495	0.252392306
CCDC28A	-0.225679599	4.40924E-05	0.000634018
RRAGD	0.304120382	0.000485486	0.004186007
HSF2	0.046447109	0.291840094	0.464218085
PHF20	-0.007858704	0.843407404	0.910244602
HSD17B6	0.007780348	0.958136962	0.977203443
NR1H3	0.121167874	0.055667887	0.144301878
TYMP	0.09978523	0.190839361	0.346571829
NCAPH2	-0.061895638	0.238578614	0.40509541
TOMM34	-0.101506069	0.057686027	0.147971106
SEC63	8.82293E-05	0.998256192	0.998894811
KPNA6	-0.098897972	0.007555189	0.033309402
VIM	0.065708627	0.384382985	0.55783283
RTEL1-TNFRSF6B	-0.124331808	0.192951969	0.349266965
FAS	-0.139599729	0.11302229	0.239556204
RNASET2	-0.084410123	0.259301748	0.429225549
CD44	0.130983733	0.101999096	0.222260247
KCNG1	0.198365128	0.234411586	0.400213054
AGPAT4	0.270101656	0.000585627	0.004826733
SLAMF7	0.227879784	0.03673809	0.10674393
BTN3A1	-0.016796216	0.783318039	0.871021569
MIPEP	-0.104745332	0.041020841	0.115623852
PRKCH	0.060889204	0.23517335	0.40101106
INSRR	0.373799686	0.018004103	0.063246487
IFNGR1	0.064782318	0.304359764	0.477371424
B4GALT7	-0.055185955	0.271197957	0.441817387
SH2D2A	0.075844714	0.364291277	0.538248232
VRK2	0.101568995	0.033583392	0.099985465
TNFRSF1B	0.233251542	0.000655223	0.005251729
VEZT	-0.006257815	0.886003819	0.935703789
POU2F2	0.240333283	0.007504427	0.033123639
BRD9	-0.160642374	0.003313984	0.017894921
SNX1	-0.027316307	0.449892506	0.61778101
TBPL1	0.059419448	0.239866807	0.406612949
ARNTL2	0.049236655	0.703536133	0.816496792
BCLAF1	-0.011279684	0.758430668	0.854955263
SLC39A9	0.049589487	0.206391856	0.366048247
ANK1	0.251954959	0.076671701	0.181753005
IBSP	0.311226884	0.110413803	0.235326557
TFB1M	-0.081184708	0.100002413	0.21913049
RABEP1	-0.00762103	0.828879626	0.90066496
HMGB3	0.204418563	0.077239312	0.182641133
NUP160	0.032809605	0.468510159	0.633882791
BAK1	0.074385727	0.203043595	0.361750637
MUSK	-0.220767232	0.154449929	0.299111726
IKZF2	-0.26252349	0.000943868	0.006933627
GRN	0.084907005	0.16055538	0.307407472
FAM13B	0.066343114	0.242423425	0.409586577
ARHGAP31	0.156281733	0.054550735	0.142165173
CENPQ	-0.030568437	0.639285726	0.770280022
SARS1	-0.092499786	0.025840394	0.082486132
RANBP3	0.050451445	0.134523004	0.271427074
ARID4A	-0.096571724	0.048976495	0.131450609
EIPR1	-0.03180392	0.515809053	0.673020296
PNPLA6	0.210471534	8.95202E-05	0.001125184
IFT88	-0.149022454	0.003070348	0.016943281
ALG1	-0.027575829	0.577710922	0.722386677
ZCCHC8	0.01957097	0.576826701	0.721708398
ABCF2	-0.015117379	0.727562199	0.833069124
CHPF2	0.046920811	0.367227074	0.540975328
LRRC7	-0.103196325	0.287963889	0.459697258
FUT8	0.000124244	0.99867259	0.999194052
UBA6	0.016060668	0.777461271	0.867538891
GAB2	0.000652395	0.992427211	0.995664821
ATP6V0A1	-0.041239074	0.406534706	0.578794246
PIAS1	-0.089202478	0.038926828	0.111243591
SLC4A7	0.077757879	0.328166243	0.501487797
APBA2	0.245735453	0.042327847	0.118317195
MAP2K3	0.086722291	0.108328093	0.232181893
EFCAB1	-0.232582681	0.224672194	0.388548571
TMSB10	-0.040742833	0.597189966	0.738003354
ASTE1	-0.005477222	0.882140042	0.933700059
RNF19A	-0.184858173	0.013135945	0.050081901
PEX3	-0.028132808	0.580973428	0.724792326
GABARAPL2	-0.036846047	0.451305722	0.619057531
MYOC	0.010274641	0.954635396	0.975327843
SH3YL1	-0.329108784	2.01868E-08	1.24639E-06
FAM136A	0.004940672	0.915353169	0.952645352
VCL	-0.042464788	0.47404925	0.638374029
DEPDC1B	0.260461691	0.01672677	0.060042919
DAPK2	-0.390916938	1.81227E-05	0.000316788
NSMAF	0.064332266	0.129542711	0.264185114
ADSS2	-0.091128437	0.024688232	0.079797444
STAP1	0.055102092	0.617013661	0.753984981
TIMP2	0.122267062	0.118858398	0.248444582
RFC1	0.006174181	0.884900339	0.935172663
TBC1D23	-0.055276089	0.206325167	0.365976078
CUL3	-0.062752671	0.064092336	0.159513286
MYOM2	-0.141163083	0.178168857	0.330337483
OTC	-0.446838908	0.033834196	0.100533721
CYP46A1	-0.203580276	0.038606432	0.1105599
ZZZ3	-0.149090253	0.001911391	0.011834318
SLC18A1	0.484464902	0.003031085	0.016763853
USP2	-0.015423837	0.889795731	0.937661658
CASR	0.944786981	0.000187375	0.002006393
TUBG2	-0.194497855	0.00100371	0.007262067
RPL26L1	0.001744161	0.97805121	0.988270342
FLT4	0.114416722	0.14672517	0.288665675
NSUN2	-0.103644616	0.062304779	0.156394447
FBXO42	-0.009882667	0.740878754	0.842228769
MFAP3	0.246669405	4.25119E-05	0.000617388
MRI1	-0.075838441	0.128924368	0.263221363
METTL1	0.126368698	0.086471184	0.198082612
HOXC8	0.421315005	0.022220616	0.073907831
AGA	-0.319961965	2.7627E-05	0.000440613
PI4K2B	-0.144559544	0.006986114	0.031389262
BOD1L1	-0.026237768	0.637732491	0.76926219
MAT2B	-0.036486086	0.457500989	0.624137426
TLL1	0.298374058	0.004111271	0.021071263
EDC4	0.03256453	0.486566901	0.649063247
TRIO	-0.005947002	0.93296102	0.962850609
VCAN	0.525022535	2.45202E-06	6.46402E-05
CLEC16A	-0.00020682	0.99647392	0.997938396
MSR1	0.462228223	1.03368E-05	0.000202965
CDH1	-0.055903212	0.403745076	0.576103426
MTREX	-0.107250476	0.01430246	0.0534485
DNAH5	0.054402989	0.636787503	0.768606141
ZFYVE16	0.028621641	0.570238153	0.716543119
RIPOR1	0.159456056	0.013055074	0.049852432
C6	0.091193535	0.630908888	0.764351937
RAI14	-0.052850333	0.47338883	0.637932195
SOX30	-0.28201623	0.068650313	0.167799515
PNKP	-0.085574889	0.087722189	0.200209873
BEST2	-0.550523192	0.004779396	0.023625691
PHLPP2	0.182707156	0.001836932	0.01147933
SPDL1	0.138530741	0.027546387	0.086459187
STAU2	0.020978856	0.726726096	0.832463674
SLC66A1	-0.021259749	0.688812787	0.806597578
CTNS	0.02247921	0.628366483	0.762308499
RTN4R	0.070889909	0.436451733	0.605964547
PHF23	-0.128629439	0.003400054	0.018231472
CDH10	0.791217892	3.59209E-05	0.000543148
INPP4A	-0.070990406	0.097504848	0.215412468
RAB27B	-0.404378579	0.000567376	0.00470662
PSMA4	-0.021067913	0.684305338	0.803127003
MYO16	0.165126621	0.272406522	0.443170856
LSG1	0.025265958	0.618322915	0.754907732
PARP3	-0.196608246	0.000371203	0.003394686
TNC	0.499542939	0.000278184	0.002730294
THAP3	-0.089576913	0.085193713	0.195846764
RIPOR3	0.331952231	0.00034438	0.003215536
TDP1	0.133150431	0.049510662	0.132580958
AIFM2	-0.106364062	0.143809262	0.284466045
C2orf83	0.141318648	0.606084512	0.74567795
SPATA7	0.004196607	0.932578964	0.962656723
MED17	-0.033255737	0.335718454	0.509196299
RETSAT	-0.119843851	0.035342181	0.103766058
CAPG	-0.015031253	0.84057791	0.908351533
AP2S1	0.043391287	0.435482639	0.605096493
USH2A	-0.009910972	0.944267856	0.969190689
ZPBP	-0.147974067	0.515316106	0.672644451
TG	0.300246847	0.017527723	0.062068657
ADAM28	0.078163247	0.475874887	0.639905118
BARX2	-0.451494627	0.003688589	0.019396898
DCUN1D1	-0.022820049	0.664804104	0.789006489
JADE2	-0.144261928	0.016099729	0.058377588
ZIC2	0.183332177	0.425486584	0.596175504
LCP2	0.325960528	2.0506E-05	0.00034682
TRIT1	0.043068779	0.421043841	0.592404309
ADRB1	-0.427287104	0.004280856	0.021719017
GUCA2B	0.253069256	0.511020707	0.669025559
CUL7	-0.03683147	0.488659517	0.650744764
CTNNA1	-0.089711178	0.046631562	0.126931622
PHKA2	-0.065240529	0.138132273	0.276597584
CNTLN	-0.166015117	0.052018814	0.137355169
EPHA3	-0.478212509	0.000700872	0.005526366
HSPA5	0.044511537	0.385862045	0.559172298
DSG2	-0.020824571	0.813730381	0.890435338
GEMIN8	0.043731572	0.347217702	0.521153569
OFD1	-0.071460038	0.153889357	0.298505206
GPM6B	-0.102518202	0.297154648	0.469734807
MAGEC2	1.327404636	0.00157706	0.010230785
PREX2	-0.138486902	0.219208395	0.381725587
WDR37	-0.028634526	0.50989638	0.668216468
YTHDC2	-0.077315681	0.105601823	0.22788841
CTPS2	0.052716371	0.281176749	0.452661017
ATP6V1H	-0.045503907	0.301914118	0.474894299
POLR2B	-0.035102628	0.377425633	0.550832475
FAM214A	-0.149474323	0.012794119	0.049129046
ARAP2	-0.11413459	0.137909933	0.276273339
TPR	-0.003046428	0.947606934	0.971215165
CP	0.310391548	0.028309039	0.088128214
KIAA0556	0.041497118	0.393987962	0.566780211
DTNBP1	0.003227186	0.931613866	0.961953955
XK	-0.264266181	0.045490928	0.124678622
ANO2	0.070158823	0.522376179	0.6779028
C12orf4	0.088721784	0.059836278	0.151879727
SCML1	0.143743922	0.072385187	0.174395071
WWC3	-0.061475226	0.327402954	0.500665588
ARHGAP6	0.171847845	0.044485669	0.122575767
FAM184B	-0.221012578	0.041863627	0.117325948
MAP4	-0.082540661	0.057570011	0.147747569
GOPC	-0.017729691	0.641036995	0.771377775
ROS1	-0.157912911	0.270678537	0.441243523
USP28	-0.055270421	0.312095391	0.485573702
HDAC9	-0.336556294	0.004834491	0.023807163
TSPAN17	-0.058930349	0.247770535	0.415825991
NOP16	-0.089443429	0.145866529	0.287498729
CC2D2A	-0.143800713	0.045155084	0.123991515
RRM2B	-0.191808405	0.002342519	0.013801516
ZNF800	-0.098716209	0.044076231	0.121797251
TNFRSF17	0.151445537	0.256037922	0.425387342
SNX29	0.033043777	0.527440517	0.681878058
LMO3	-0.372957476	0.004988533	0.024431837
MRPS10	0.012155644	0.820023078	0.894553376
GUCA1A	0.471501785	0.007269108	0.032345273
RSF1	-0.121923828	0.015776087	0.057522998
VPS13D	-0.103907662	0.095925057	0.212913596
CELF2	-0.275651121	0.000753121	0.005816718
FAM120A	-0.049065201	0.229724775	0.394685834
R3HDM1	0.028638561	0.537947221	0.690856505
COL9A2	-0.053726849	0.682494665	0.801822536
KITLG	-0.001568962	0.985719756	0.992014983
ERCC8	-0.070258099	0.140073302	0.279207801
ADAMTS6	0.229176071	0.03648808	0.10622214
H6PD	0.113330809	0.053857295	0.140870883
VAMP3	-0.056896732	0.13170049	0.267249139
PER3	-0.289947853	0.001741855	0.011055305
UTS2	0.367213517	0.027216486	0.085661548
TNFRSF9	0.352545184	0.001849388	0.011536685
EPN3	-0.218204582	0.028929136	0.089570036
LTBP1	0.108616747	0.207565331	0.367388896
RCN1	0.083993429	0.171658889	0.322071091
ELN	-0.114391672	0.33522783	0.508744492
RFC2	0.033763726	0.570040014	0.716422041
ARID1B	0.021536095	0.60805126	0.747053611
CLPTM1L	-0.162147832	0.0149957	0.055443742
NEDD4L	-0.460184637	3.44462E-09	2.75518E-07
FOXP3	0.313517581	0.000253454	0.00254873
PPP1R3F	-0.077016814	0.328922775	0.502207759
HEXB	0.089975743	0.081084312	0.18901841
PTCD2	-0.111741817	0.012665315	0.048758575
NEXMIF	-0.103359469	0.530138937	0.684087863
JKAMP	-0.009060785	0.813552152	0.890332586
DKK3	0.009620155	0.915202738	0.952585102
ARHGEF5	-0.172302304	0.001892016	0.011738446
NFE2L3	-0.126805275	0.159326697	0.30592194
MCUR1	-0.065409795	0.140205862	0.279356083
LIMA1	0.076297209	0.222697762	0.385952545
LETMD1	-0.238529261	8.65383E-07	2.78346E-05
SLC4A8	0.436267963	0.000413212	0.003700334
LAMC3	0.217522924	0.041502717	0.116580251
PTGER3	-0.421879479	0.003798182	0.019842116
TNIP3	0.598871235	2.98787E-05	0.000471187
MAPK9	-0.093934131	0.054623899	0.142329498
COL23A1	0.067787975	0.565403555	0.712225317
BCAR1	0.030535385	0.634133277	0.766762578
FAM160A2	-0.058921558	0.177360196	0.329358711
HERPUD1	-0.036353254	0.514328312	0.671814712
HOMER3	-0.059135905	0.444027956	0.612966623
RAD51	0.164893776	0.066125299	0.163357267
POLQ	0.095846795	0.37784431	0.551138773
PIK3CB	-0.078528149	0.158496033	0.305003394
CYBA	0.107922892	0.199649163	0.357619013
THOC3	-0.058387436	0.364703507	0.538492476
HEBP2	0.002398247	0.966742604	0.982442032
MPHOSPH9	0.146751471	0.031298633	0.094902632
PLEKHA5	-0.130844141	0.060117152	0.152364451
PRSS8	-0.103110678	0.227170785	0.3915069
SIKE1	-0.108267792	0.021941611	0.073213859
RRP12	-0.08300795	0.145032358	0.286295528
FNIP2	-0.185703438	0.029037411	0.089810286
MSMO1	-0.15599551	0.023316818	0.076542235
TTC17	-0.028792655	0.486910592	0.649439665
ALX4	1.004426243	3.73923E-07	1.40954E-05
FSTL4	0.224780729	0.229507405	0.394430415
FOXN3	0.08963338	0.136567177	0.274329577
METTL24	0.243832792	0.016827179	0.060316195
AKR7A2	-0.057550405	0.249520059	0.417979217
MRTO4	-0.024449135	0.66308267	0.787716099
NNAT	0.235498563	0.019238926	0.066369736
USE1	-0.130278495	0.018136124	0.063599168
MCF2L2	0.091005287	0.358768112	0.532678065
NRIP2	-0.096284431	0.116934671	0.245470973
LAMA3	-0.039643581	0.79190042	0.876259982
AP5M1	0.026297836	0.503748965	0.663371572
ANAPC4	-0.105655406	0.011859959	0.046475814
KCNQ1	-0.005096001	0.964814895	0.981541315
TRAPPC3	-0.06162287	0.153087383	0.297400357
THRAP3	-0.052807271	0.086984725	0.199010721
PHPT1	-0.198552257	0.008851634	0.037386826
ENTPD2	0.378004534	0.007391144	0.032739962
LY75	0.013159998	0.873223097	0.927747367
ARID4B	-0.001821274	0.966638044	0.982431707
OPN3	0.040038036	0.731560373	0.835842807
SDCCAG8	-0.137683357	0.002352016	0.01385167
PTPRN	1.694935483	1.35244E-18	6.88149E-16
HHAT	-0.04419985	0.54944019	0.700010803
KIF1B	-0.068250358	0.186930829	0.341426466
FOXC1	-0.018567626	0.867970536	0.924604621
TBC1D22A	-0.040910144	0.322004923	0.495389469
SYNE2	-0.130095865	0.087512591	0.199925983
PLEKHH1	0.079338464	0.544779976	0.696405483
ATP9A	0.011750632	0.860089225	0.919996153
SPO11	0.05072339	0.943516964
CBLN4	0.049426524	0.740490306	0.8419683
CHRDL2	0.531630786	0.000221893	0.002288399
FAM168A	0.005380338	0.913729559	0.951678835
RELT	0.332247255	1.6931E-07	7.34117E-06
GALC	0.146488747	0.009229905	0.03852972
NOP58	-0.053073851	0.209130037	0.369477063
SZRD1	-0.019563128	0.62146054	0.757118751
KCNH2	0.757044504	2.23085E-06	6.02003E-05
CUL1	0.020942672	0.516828113	0.673933519
FAM114A2	-0.041451398	0.319174068	0.492648632
CYFIP2	0.039423418	0.636863498	0.768610675
TAB2	0.045557405	0.280967699	0.452393452
GINM1	0.009697576	0.828078359	0.9000722
EIF2AK2	0.069380997	0.180859001	0.333669885
USP36	-0.06595179	0.099300367	0.218010662
KMT2C	-0.077333464	0.242679771	0.409855718
MCOLN3	0.046569307	0.736807768	0.83956197
CCDC85A	-0.070790916	0.548527414	0.699354237
PUM2	-0.083825525	0.008839482	0.03736079
MRPL43	-0.162707172	0.002763401	0.015627202
ITIH4	0.446349073	0.000191637	0.002043742
ITIH1	0.427248864	0.002156421	0.012987731
HPF1	-0.072041679	0.127559618	0.261214747
ZFR	-0.002674741	0.94111744	0.967414851
ZNF280C	-0.098644886	0.069165163	0.168706524
NPFFR2	0.698960822	0.009111069	0.038191432
PHF21B	0.060446996	0.743349918	0.844101592
TRAF1	0.19337829	0.008163856	0.035253168
RC3H2	0.027260275	0.605799524	0.745395762
IL17RB	0.002791918	0.976889715	0.987741966
TRAF3IP2	0.00411185	0.932872646	0.962806461
GYG2	0.133273143	0.183210502	0.336787061
DCBLD2	-0.088918168	0.458509784	0.624920455
SERPINB3	0.730652981	0.008106317	0.035110302
SOAT1	0.162423645	0.00105128	0.00750848
PKP2	-0.081070893	0.585269815	0.728492352
MSH4	-0.492674056	0.000215434	0.00223488
F7	0.658688289	0.001245161	0.008556074
GDI2	0.071393063	0.11459187	0.24179085
PRDM1	0.102400706	0.195007351	0.351540977
ATG5	-0.025362526	0.589463227	0.731816769
TMCC3	0.013615836	0.868669819	0.925016785
PITHD1	-0.092640089	0.012136423	0.047253303
MTA3	-0.114864177	0.012070878	0.047075197
USP13	-0.281836181	3.38264E-05	0.000520232
ATP11B	0.016175958	0.790838758	0.875824787
LAMC2	0.077272045	0.571014131	0.717134112
CDK14	0.120513633	0.149025101	0.291844565
SEC61A1	0.145726848	0.000470701	0.004081022
PPP1R12A	0.013481654	0.785070048	0.872088965
RASGRF1	0.010477637	0.947144538	0.971057684
CAMK2B	0.885598019	2.20039E-06	5.94923E-05
CROCC	-0.096666756	0.189008506	0.344060656
POLR3E	-0.015133087	0.704954472	0.817385642
ATP2B4	0.101443568	0.161967735	0.309196051
ZC3H11A	-0.04437931	0.344248599	0.517985779
RIOK2	-0.066340725	0.083178394	0.192494573
YIPF1	-0.001883117	0.964694396	0.981521002
NDC1	-0.00509721	0.934721219	0.963743495
DGKG	0.274416395	0.005781666	0.027238568
FLYWCH1	-0.065957544	0.211560692	0.372152246
UNKL	0.049228663	0.405064953	0.577305046
TBXAS1	0.337934514	7.3279E-06	0.00015567
PARP12	0.025163232	0.641439147	0.771663811
ALDH18A1	0.069102963	0.180690655	0.333432131
TARBP1	-0.174695683	0.006849997	0.030915571
GATB	-0.137348665	0.004341879	0.02195389
MXD1	0.016886202	0.838555272	0.907118418
CDK17	-0.013660866	0.771811522	0.863607668
DNAJC25	0.000114525	0.997844259	0.99871925
SLC2A3	0.176335221	0.096097181	0.213194796
PSD	0.059329335	0.441894435	0.611130294
CTDP1	0.029894651	0.503518684	0.663192398
YBX3	-0.056371328	0.321910383	0.495297263
STYK1	-0.058201331	0.573988289	0.719480722
WNK1	-0.265413865	2.77325E-05	0.000441962
RPS17P5	-0.499076696	0.002035942	0.012408994
CCAR1	0.01629363	0.646915214	0.775724775
OGFR	-0.010279495	0.851234697	0.914392566
GNA15	0.077096389	0.310333245	0.483580311
CREB3L3	1.635289259	1.87333E-17	7.99134E-15
PIGV	-0.211310037	1.03768E-05	0.00020345
PTPRU	-0.319783266	0.000922043	0.006808836
SNRNP40	-0.045493253	0.292040685	0.464432227
RIMBP2	1.132937382	6.42349E-07	2.19657E-05
COL11A1	0.574176342	0.002390493	0.014031316
QSER1	0.013714794	0.807881878	0.886723691
MPC1	-0.000906969	0.988322562	0.993474363
ACAA1	-0.21863809	3.05318E-05	0.000478804
BCAT1	-0.534554025	3.90992E-05	0.000579382
HDAC7	0.055672351	0.249878571	0.418382897
LZTS1	0.272333861	0.000911731	0.006753944
PRDM6	-0.029488582	0.756724566	0.853556045
WNT8A	-0.136987944	0.651461227
SPAG4	-0.095613128	0.298002328	0.470706154
NCKAP1	-0.048357194	0.292641599	0.465072628
MRPS35	0.16214345	0.017803442	0.062737862
GUCY1B1	0.113904999	0.101599407	0.2216409
SFSWAP	-0.047508084	0.250728114	0.419246968
TNK2	-0.170847514	0.006842139	0.030891301
MON2	-0.051536597	0.368768703	0.542340154
CDH3	-0.034880918	0.79300047	0.876953829
ARSF	0.160834335	0.266364561	0.436451914
GPBP1	-0.055386275	0.104078224	0.22548769
DGAT2	0.131372211	0.165302889	0.313586901
ZNF112	0.026205824	0.639627773	0.770428387
CS	0.063254888	0.159330881	0.30592194
LTK	-0.293010221	0.042976948	0.119596893
MRPS24	0.041910788	0.582190538	0.725924736
ELMO2	0.026566696	0.477581692	0.64120903
WAPL	0.002797576	0.944682226	0.969390187
VMP1	-0.17227239	0.013969	0.052555797
APPBP2	-0.023040158	0.561998316	0.709418726
POLD1	0.007272956	0.903382815	0.945635331
SEZ6	0.709615651	5.6969E-05	0.000777774
EIF4B	-0.106938318	0.02512932	0.080864175
SLC6A16	-0.037370777	0.690461744	0.807588013
BICRA	-0.050773399	0.411992491	0.583873471
SPHK2	-0.003566988	0.950174765	0.972818266
RPL18	-0.241679531	0.00039761	0.003585703
CA11	0.080985369	0.40787397	0.580114286
ISOC2	0.007858824	0.901315337	0.944404702
U2AF2	-0.040658797	0.363135924	0.536954938
EPN1	-0.098425433	0.063316381	0.158214153
MED29	-0.03999664	0.381289738	0.554689225
AHRR	0.103518062	0.429561899	0.599691188
GSC2	0.011447567	0.982860895
ZNF275	0.150340251	0.003958772	0.020487041
MTMR1	-0.032570312	0.410036398	0.582013819
GPC1	-0.26652349	0.005012296	0.024531149
ADCK1	-0.051872498	0.326521941	0.500042594
HAGH	-0.11105948	0.044468944	0.122547283
RNF4	0.003743647	0.910514192	0.949569956
CASP8	-0.033676196	0.455693068	0.622830177
LIMCH1	-0.13839428	0.098240951	0.216562891
INTS13	0.032967801	0.602038422	0.741934083
TM7SF3	-0.105912094	0.135886162	0.273286556
DLX3	-0.202910079	0.182841495	0.336284383
SPA17	-0.124058145	0.093707619	0.209367271
TSPAN32	0.050655727	0.624372937	0.759090246
CCN5	0.001227775	0.990912359	0.995106548
DMRT3	0.204751329	0.369108223	0.54272608
ST3GAL6	0.128547524	0.126408779	0.259553459
ATP2C2	0.258396826	0.016457402	0.059333189
NGFR	0.20658987	0.101996872	0.222260247
CDON	0.404690339	0.0001237	0.001446315
TAF2	0.04646844	0.364944433	0.538742075
HIPK2	0.008603186	0.912322168	0.950844989
TNPO3	-0.050265124	0.243246296	0.410369415
BORCS8-MEF2B	-0.12289103	0.100700016	0.220145102
RFXANK	-0.167684569	0.004315302	0.021849159
TMEM161A	-0.025031869	0.672066907	0.794380765
LPAR2	-0.165993801	0.003548869	0.018833356
CTSA	-0.169383716	0.005035003	0.024608062
SUGP2	0.064163055	0.224554536	0.388408713
SLC12A2	0.251948773	0.011346938	0.044995669
SNX24	-0.191491227	4.14143E-05	0.000606526
EYA2	0.268311211	0.120231235	0.250449123
CNN2	-0.100022801	0.086249521	0.197746459
ABCA7	-0.102630675	0.194534458	0.350930169
SNCAIP	0.359950613	0.001086589	0.007691724
DDX20	-0.030176483	0.409286487	0.58122287
BTBD1	0.010127357	0.775943638	0.866623958
FAR2	0.432177593	7.26468E-06	0.000154755
BCAS1	-0.581290327	0.001124785	0.007902502
POU1F1	-0.406004515	0.002199906	0.013183826
CHI3L2	-0.197765869	0.158778554	0.305351188
SBNO2	0.141148548	0.033005097	0.098681454
PMS1	-0.077698218	0.070356008	0.170772741
HMG20B	-0.037038345	0.479901308	0.643300811
CALCRL	0.149605163	0.082083592	0.190721514
TAF11	0.026423853	0.555634759	0.704669869
ANKS1A	-0.02777219	0.57122337	0.717326731
AP3D1	0.073479728	0.10037283	0.21967003
ZNF76	-0.117153003	0.013963177	0.05253857
SLC9A3R2	-0.21694402	0.00619152	0.028658511
NTHL1	0.013048854	0.861860226	0.921073995
UHRF1BP1	0.008315763	0.874328696	0.928548779
GNAI3	-0.024980208	0.543584535	0.695614268
IPO5	0.067350471	0.189363807	0.344563805
OAT	0.241271973	0.003400656	0.018232388
WDR3	-0.113556558	0.028967941	0.089637609
PKN2	-0.050666137	0.317731345	0.491348937
WDR18	-0.015049495	0.815465301	0.891626517
TRAM2	0.099527723	0.076656348	0.18173071
NTN1	-0.065834768	0.599233904	0.739620243
GLP2R	1.064948545	4.77705E-08	2.57327E-06
MCM10	0.207575013	0.06509988	0.16138167
DGKA	-0.013537597	0.846373413	0.91148413
ERBB3	-0.020053047	0.796058189	0.878862559
ROPN1	-0.634537615	0.014830201	0.05499268
ANKRD44	-0.188217801	0.024833951	0.080176395
KARS1	-0.039893241	0.361824336	0.535788848
ADAT1	0.040170397	0.362309214	0.536107449
PDIA5	0.210154848	0.000242278	0.002454683
TBC1D22B	-0.12038845	0.000643882	0.005183456
NDUFB4	-0.090020435	0.118473939	0.24786443
SPEN	0.007167746	0.884594502	0.93512378
MYLK	0.094882006	0.254082855	0.423239364
ZC3H15	-0.013508765	0.747697557	0.847129798
MAP2K4	-0.079564418	0.038918533	0.111234941
PACC1	0.135751979	0.026668578	0.08435196
SNAP91	0.312968902	0.128910513	0.263205802
SLK	-0.191574841	0.000627511	0.005076831
CYB5R4	0.146178889	0.007470521	0.033005026
COL17A1	-0.075391689	0.699276118	0.813369753
GSTO2	-0.534910606	6.28704E-07	2.16217E-05
SEC61A2	0.078339878	0.218220513	0.380507379
PRKCQ	0.047874099	0.620995701	0.756769861
TLE2	-0.184411839	0.019423581	0.066834146
ASB1	0.040261355	0.316049664	0.489633507
FAM107B	-0.04685554	0.502384718	0.662173821
ME1	-0.040320551	0.696915341	0.811951036
TBC1D1	0.085685252	0.20049276	0.358567385
CDK13	0.02823437	0.450030864	0.617850638
MTHFD2	0.213232613	0.009077432	0.03808067
SLC9A7	-0.009208707	0.902591117	0.945251899
FOXJ2	0.006266754	0.887481602	0.936395172
YBX1	-0.008270005	0.872860012	0.927501611
PDE4A	-0.112823222	0.070755298	0.171465987
PPP2R5A	-0.190202368	0.000788598	0.006025707
CTNNA2	0.555298208	0.012295182	0.047690131
ELAVL1	0.015056656	0.598181367	0.738817755
TIE1	0.224352563	0.00379942	0.019842116
DIP2B	0.086176165	0.11178966	0.237467981
SMARCD1	0.118042817	0.008471789	0.036227278
KDM4A	0.023663066	0.531706706	0.685466898
NFYC	-0.090760665	0.022945076	0.075615797
ZMYND12	-0.219601084	0.017354233	0.061676678
SLC9A3	0.483819371	0.000703548	0.005543332
NGEF	0.196827103	0.150020629	0.293155248
ASPM	0.196682546	0.076797651	0.181922727
CD84	0.318452893	0.00093192	0.006868562
ELOVL1	-0.154079906	0.001342716	0.009084519
SPI1	0.378108147	1.6683E-05	0.000297031
ZNRD1	-0.057260317	0.308101239	0.481292085
MPPED2	-0.272417812	0.017787647	0.062715637
CLDN18	0.297610904	0.18161945	0.334707305
ZBTB11	-0.139430772	0.000219464	0.00226889
ATXN3	-0.098408722	0.039683617	0.112871667
GOLGA5	-0.003185714	0.938091378	0.965747679
FGFR2	-0.268958596	0.018147657	0.06363433
LRRC40	-0.041972989	0.405162033	0.577365467
ISOC1	-0.114033093	0.019091444	0.065984931
EML1	0.158568727	0.056416525	0.145679161
TRMT11	-0.060626861	0.193590671	0.349928147
THUMPD1	-0.023426464	0.529755856	0.683739779
MSANTD3	0.024326212	0.650324959	0.778472893
KIF26A	0.23419329	0.063204874	0.158036508
ATG2B	0.034114138	0.525293213	0.680204298
ARFGEF1	-0.143087217	0.014028574	0.052737647
ACSM2B	-0.195747989	0.416573565	0.588425139
ZFAT	0.091378295	0.181318208	0.334273981
MTFR1	-0.032561766	0.645154752	0.774425981
STAG3	-0.005500479	0.963536207	0.980782603
FECH	0.024318627	0.711158699	0.82193807
MYO9A	-0.213059002	0.000892128	0.006639004
DDX3Y	-0.096200673	0.749335828	0.848541948
PFKP	0.06743139	0.489202063	0.651159277
IDI1	-0.119630377	0.076763531	0.181870254
SP100	-0.089768365	0.052151967	0.137655116
KLF6	-0.101637029	0.136817198	0.274701147
PLPP1	0.052799179	0.485332892	0.648092667
NEO1	0.250354085	0.002236082	0.013330637
TRAM1	-0.1454508	0.039037308	0.111439483
PHKA1	0.011106587	0.862414582	0.921215204
TNFRSF1A	-0.139231058	0.015586402	0.057012092
CACNB1	-0.356991374	0.000271837	0.00268606
EVI5	-0.102539311	0.073023376	0.175442212
STOML1	-0.02987916	0.632209381	0.765356646
PKM	-0.049428267	0.42031192	0.591880728
DHX29	-0.059443777	0.219174083	0.381681575
DNTTIP2	-0.123982254	0.006430293	0.029425089
METTL22	-0.005214111	0.902800298	0.945291449
TP53BP1	0.034204168	0.508495159	0.66733274
TRO	0.193399172	0.061962362	0.155817225
RRP15	-0.113227281	0.013607361	0.051474925
RHOA	-0.096592489	0.011989482	0.046852949
DHX8	0.022618909	0.516141644	0.67330864
PMS2P4	-0.102527429	0.046748553	0.127184494
PRKCZ	-0.572522869	3.53962E-12	6.67344E-10
ZFY	-0.142096209	0.673316754	0.795354473
IARS2	-0.035285232	0.453000114	0.620394357
SYT1	0.261764295	0.105658458	0.22798733
NAV3	0.092800636	0.431102961	0.601028003
IDH3G	-0.072480671	0.152027624	0.296008789
ROGDI	-0.101251047	0.093046255	0.208330477
PDZD4	0.11064908	0.389555699	0.562836684
ATP2B3	0.050308403	0.784753747	0.87194402
ROCK1	0.006101988	0.906590698	0.947513818
CBFB	0.054191158	0.151216604	0.29481025
PDK3	0.062221307	0.410826022	0.582899531
HYAL2	-0.070591171	0.186015086	0.340467937
HDAC4	0.139522988	0.014882043	0.055160474
RASSF1	-0.041544356	0.33729952	0.510718491
FGFR3	-0.52042692	0.000340161	0.003186445
IFI35	0.094685289	0.231746179	0.397075001
HEATR6	-0.054094166	0.204375816	0.363469337
COASY	-0.077396733	0.108774098	0.232877812
PLEKHH3	-0.249061737	3.5961E-05	0.000543559
MEF2A	-0.053347149	0.199726284	0.3576813
OTUD5	-0.081701888	0.049807148	0.133197536
TFE3	-0.040663138	0.36456197	0.53840821
TBC1D25	-0.046483845	0.282312086	0.45388677
ACSL4	0.188583985	0.015528829	0.056869017
INPP5A	-0.034937156	0.433792856	0.603522975
GPKOW	-0.02214133	0.654477097	0.781062869
GRIPAP1	-0.051039453	0.320957863	0.494331291
FTSJ1	0.002953313	0.950283751	0.972864556
PRR11	0.130512681	0.196715185	0.353693703
REEP1	0.323827971	0.02094931	0.070688055
ATP11A	-0.188391461	0.045974904	0.125678823
POLR1A	-0.017498399	0.716080126	0.825143134
LAPTM4A	-0.076308511	0.091970746	0.206591424
TTC7A	-0.061279582	0.21453284	0.376033489
IP6K2	-0.165840028	2.63126E-05	0.000423166
STON1-GTF2A1L	0.430936329	0.00125647	0.008618361
SRBD1	0.012373854	0.747558953	0.847064887
KIF2A	0.166367258	0.006278699	0.028941497
RASGRP2	0.074933894	0.445688877	0.614205667
PSME4	0.078667208	0.080677794	0.188306648
IFT80	-0.317736148	5.38178E-07	1.89354E-05
SIRT2	0.098316265	0.055214893	0.143479902
ERLEC1	0.000546995	0.991469338	0.995240322
PPP2R5B	0.070433983	0.181306167	0.334273981
PYGM	-0.076008883	0.446646883	0.615009453
PAGE1	-0.730333809	0.124556415	0.256748658
PITX1	-0.19414481	0.241074138	0.408123266
TRPC7	-0.396426474	0.225481051	0.389580482
MAST4	-0.151354866	0.050178661	0.133860477
ADGRF5	-0.510289095	1.59033E-05	0.00028592
SDK2	0.313055597	0.023209927	0.076256546
ADAM7	-0.593835871	0.118032957	0.247214212
NUP133	0.034337116	0.375952606	0.549537258
NUCKS1	-0.045914756	0.324853366	0.498318526
VPS35	0.051620371	0.182236078	0.335580101
DNAJA2	0.082496869	0.036914624	0.107072693
BCL3	0.295175161	0.000150083	0.00169022
KCNAB2	0.262263154	0.000231357	0.002369222
ABCC9	-0.200008758	0.063207774	0.158036508
GAL	0.741342931	0.000554761	0.00463017
CLEC2D	-0.125259308	0.138377616	0.277004478
FUNDC1	0.042182319	0.430363702	0.600443481
MAOB	0.107194762	0.327004134	0.500436244
RORA	-0.018908155	0.838153086	0.906891474
DRD4	-0.129548417	0.273292793	0.443984839
TGFBR3	-0.111356491	0.291570671	0.463929341
PLA2G10	-0.967688889	4.91081E-09	3.7301E-07
HES2	0.027973797	0.843606892	0.910264353
ATP1B3	0.152160336	0.01315463	0.050135038
NEDD4	0.071339176	0.332801392	0.506244585
PIGB	-0.187676431	0.000101554	0.00124102
MAPK6	0.138295331	0.029022324	0.089786155
GNB5	-0.050949015	0.255747012	0.425090831
RAB27A	-0.328209986	8.97903E-07	2.85329E-05
HDHD5	0.062148256	0.231776608	0.397094918
UFD1	-0.027514064	0.5719844	0.717861669
LRP6	-0.199015104	0.001934516	0.011929044
GUCY2C	0.386404677	0.001365733	0.009194585
SCT	0.084527673	0.470035717	0.635109884
PHRF1	-0.043809226	0.359092084	0.533082983
ELP1	0.013730849	0.718277047	0.82672725
NUCB2	0.092909591	0.134605259	0.271530415
PFN2	0.067392143	0.549866449	0.700215894
PTPN3	-0.061697369	0.331178557	0.50453926
SPTB	-0.422973222	0.013216122	0.05032398
DAPP1	0.035620214	0.678472395	0.799050772
FGF10	0.499558358	0.002393676	0.014046093
SLC44A1	0.011204474	0.844335297	0.910478201
TMEM260	0.070410061	0.203976162	0.362983367
SMG6	-0.045265036	0.377469773	0.550851795
EXOC5	0.118545586	0.015162917	0.055902252
CLTCL1	-0.000769327	0.992434898	0.995664821
FGF22	-0.43867544	0.000465602	0.004048445
FSTL3	-0.390490473	0.000100664	0.00123332
DGCR2	-0.145157784	0.005322997	0.025621244
RNF126	-0.04603796	0.407929529	0.58015423
MNT	-0.079117843	0.066501224	0.16398068
ZXDC	-0.048369586	0.252136065	0.42102765
JMJD6	0.002385717	0.957720869	0.976873436
POLB	-0.235235936	0.001455067	0.009632068
ST6GALNAC1	-0.181078918	0.171825875	0.32228417
WIPI1	0.095807886	0.054296324	0.141659501
FRMPD1	0.985214009	7.43358E-10	7.49248E-08
GBA2	0.007365115	0.881812243	0.933540953
NDST1	0.217027707	6.21845E-05	0.000834502
ASNS	0.281781941	0.001217597	0.008410458
AP3M2	0.069591134	0.208525526	0.368640379
CNGB1	0.447948168	0.005129237	0.024935874
ST6GALNAC2	-0.35559367	0.001141098	0.007997157
CHAT	-0.196350714	0.59988631	0.740151713
PABPC1	-0.101346429	0.112242979	0.238207344
TESK2	-0.058469891	0.28789266	0.459679397
CFAP20	0.049658214	0.240729675	0.407719897
CSNK2A2	-0.029215083	0.44115574	0.610444661
PTPN21	-0.108625656	0.121731775	0.252702337
EIF2B3	-0.022819864	0.588546804	0.731044372
CAMK2A	0.147051664	0.145421228	0.286862034
TCOF1	0.02914736	0.590445508	0.732734703
CDC42	-0.03237945	0.488042003	0.650235994
OSBPL3	0.086410904	0.219863828	0.382409669
EPHA8	1.303440208	5.05166E-10	5.39072E-08
SLC12A3	0.055113208	0.631839381	0.765113577
RAD18	-0.192985524	1.74088E-05	0.000306848
ATP2B1	0.113026868	0.139546834	0.278579148
TRPM5	-0.479772009	0.013011103	0.049731639
NCK2	0.02174804	0.648889512	0.777252627
MAP4K4	0.190726912	0.00523424	0.025318111
MGAT4A	0.385295614	6.88601E-09	4.99708E-07
RPL31	-0.286008981	1.9974E-05	0.000340559
WDR1	0.026924045	0.510681984	0.66878943
SNX13	-0.060309577	0.351385816	0.525519748
MS4A12	0.06437648	0.88671027	0.935954715
ARHGAP10	-0.143974812	0.046707302	0.127080452
RPS6KA2	-0.264785295	0.000502283	0.004292274
ING3	-0.047653466	0.264492114	0.434462504
VASH1	0.339659283	1.18766E-07	5.44004E-06
LMCD1	0.012921713	0.843541614	0.910264353
BUD23	-0.122276625	0.013028484	0.049789064
SEL1L	0.215126356	5.35747E-05	0.000739885
TRIP13	0.078331794	0.472414057	0.637208254
ATP6AP1	0.030478968	0.499594837	0.659670121
TCF3	-0.001139213	0.983779084	0.99104812
TRIB2	0.390275811	7.86481E-07	2.57678E-05
DAZAP1	-0.043798719	0.229097854	0.393975917
MBD3	0.066646312	0.252748747	0.421783897
PRLH	0.201423784	0.446060104	0.614556823
HLTF	-0.095028189	0.151950195	0.295873816
FAM50A	-0.154153602	0.013614817	0.051493907
FAM3A	-0.058825486	0.330083113	0.503378833
CPSF1	-0.061216681	0.33321293	0.506649342
MYO3B	-0.395291617	0.02281943	0.075354614
CYBRD1	-0.325057244	0.000532839	0.004496075
CDH19	-0.258783789	0.128907733	0.263205802
PDCD2	-0.061497164	0.144751288	0.285901056
SLC6A15	-0.621209478	0.027179823	0.085565284
RDH11	0.17674336	0.000541873	0.00455229
PRKACA	0.00420922	0.921049919	0.955648974
ADGRL1	-0.187119799	0.012729257	0.048955649
SPP2	0.692690949	0.001642462	0.010570629
ACTN1	0.216380385	0.001453156	0.009623598
ZFYVE26	0.075956589	0.104831781	0.226685613
RPS6KA6	0.226105406	0.077949782	0.183912322
EPN2	-0.100903473	0.049015526	0.131521931
PTPN18	-0.140512846	0.001424501	0.009484394
LIMS2	0.088370908	0.297458581	0.470031373
ASIC4	-0.264234892	0.050097775	0.13370382
SPEG	0.266106304	0.030803983	0.093791064
LNX1	-0.124182053	0.084473824	0.194604983
ALDH3A2	-0.311426557	0.000837484	0.006319213
TFRC	0.175960164	0.054511431	0.142080278
SREBF1	-0.122863145	0.084696603	0.195011827
TRPC5	-1.247034002	4.7538E-06	0.000110007
AFF4	-0.019456184	0.720326061	0.828070072
UBE2D1	0.022834595	0.63943485	0.77034981
MPP5	-0.153531613	0.001447802	0.009592656
RHOBTB1	0.001290805	0.98478653	0.991573758
SMC1A	0.276665246	1.18176E-07	5.4248E-06
HSD17B10	0.056309928	0.316779944	0.490405081
MARK2	-0.047005886	0.281992451	0.453542882
HMMR	0.294377082	0.003866621	0.020135038
CHFR	0.187962898	1.35336E-05	0.000251674
TRHDE	-0.245023937	0.198334391	0.355852579
P4HA2	0.039508646	0.545172481	0.696675266
FCGR2B	0.285688254	0.002830384	0.015912078
NFATC3	0.018575843	0.753021895	0.850862209
TRNT1	-0.050768889	0.260250577	0.430155467
ACADVL	-0.148400717	0.011712541	0.04600484
STK10	0.213296201	0.000424303	0.003777226
FBXW11	-0.021937212	0.633663272	0.766325916
ACAP1	0.0563035	0.510472236	0.668591249
CRMP1	0.456170998	3.13904E-07	1.22182E-05
EVC	0.074889929	0.262377816	0.432406973
DERL2	-0.01817868	0.672892135	0.795008551
SIDT1	0.188583752	0.051996679	0.137307913
NDE1	0.189783816	0.001069371	0.007610663
IRAG1	0.095772871	0.241938011	0.409046619
TMEM38A	-0.00925453	0.911051364	0.949778356
AP1M1	-0.002247542	0.957161973	0.976444863
PVR	0.071255044	0.266966924	0.437067452
XRCC1	-0.074555974	0.121703349	0.252668166
SCARB1	0.19946843	0.024434624	0.079268939
CYP2W1	0.099701032	0.609062293	0.747848879
MCM2	0.085248489	0.332487269	0.505852818
MOV10L1	0.637621647	1.04708E-06	3.21836E-05
PANX2	-0.253887483	0.042322481	0.118313565
SELENOO	-0.039684593	0.524159497	0.679236081
TP63	0.13341256	0.442093569	0.611225548
ALPK1	-0.091948399	0.093009939	0.208271249
LLGL2	-0.189655993	0.007112246	0.031811522
PDE8A	-0.024046584	0.665863439	0.789908561
CLCN4	0.325362652	0.000200139	0.002115385
NLE1	-0.051918683	0.314047047	0.487604224
SDHA	-0.128642711	0.019583488	0.067238712
SMARCE1	-0.029557069	0.441328902	0.610556919
FNDC8	-0.041339791	0.731886338	0.836035533
GSDMB	-0.067576174	0.475580485	0.639681351
KDM5A	0.028582159	0.578193128	0.722668684
ADAM11	-0.228027779	0.046255714	0.126234012
PPP2R3A	-0.157632695	0.044734105	0.123123745
FERMT2	0.019929491	0.739559786	0.841431312
ABCB11	-0.209937574	0.262350042	0.43239225
DHRS9	-0.156578596	0.312648743	0.486211958
CD5L	0.458615284	0.008606478	0.036614161
PTGS2	0.452449571	0.004342225	0.02195389
IGF2BP2	-0.120599868	0.322052931	0.49544439
MAP3K13	-0.135527198	0.007895672	0.034436645
ST6GAL1	0.003149166	0.967505935	0.982698928
TBX21	-0.326566908	0.006283259	0.028949877
VDAC1P1	0.060232231	0.537066066	0.690196423
FRY	0.004388033	0.956109128	0.976030957
PICALM	-0.004590873	0.910202517	0.949385227
NSF	0.05150667	0.238019458	0.404280798
GLI2	0.174027682	0.055547787	0.144098915
CLASP1	-0.032287559	0.441391139	0.61061421
MRPS34	-0.119793466	0.041342549	0.116305525
NOTCH3	-0.119504961	0.128107091	0.262065124
CLNS1A	-0.069804453	0.111870344	0.237580052
PPP2R2C	0.253799114	0.241930992	0.409046619
TEAD2	-0.053103167	0.47654754	0.640370037
EED	0.04564281	0.300237519	0.473279493
CDHR2	0.015107718	0.932613591	0.962656723
SNCB	-0.117361633	0.461128731	0.626936812
TSG101	-0.055983443	0.174483248	0.325640332
NCBP3	-0.013514456	0.790340685	0.875548706
ATP2A3	0.745876757	2.44913E-12	4.76643E-10
CA12	0.180966324	0.299222732	0.472049848
MGLL	-0.231374746	0.006939879	0.031241841
NTN4	0.024016703	0.783256466	0.871021569
BCS1L	-0.140036452	0.000820633	0.006212037
NUAK1	0.470531892	4.57742E-09	3.50206E-07
DPP8	-0.038733154	0.36026843	0.534267025
SLC24A1	-0.047342606	0.363136247	0.536954938
ZNF532	-0.013467737	0.816503835	0.892170537
SCARF1	0.15173466	0.075205174	0.17921594
LMAN1	0.069607259	0.186343027	0.340800307
HACD3	0.006711498	0.904169941	0.946060774
IPCEF1	-0.039522101	0.761533737	0.857080609
ZZEF1	0.045852049	0.382700755	0.556224603
NOX3	0.245672231	0.544430419
ENO1	-0.060373764	0.334371401	0.507792635
SLC12A1	-0.266510483	0.16004719	0.306716565
MYDGF	0.061564415	0.331424832	0.504728891
ANO8	-0.114486593	0.117953909	0.247106973
TUBE1	-0.081150398	0.121848367	0.25282244
ARHGEF10L	0.137629026	0.02546319	0.081627557
TXK	-0.137572905	0.164188679	0.312215225
WSCD2	-0.088325813	0.501712693	0.661597778
KCNQ2	0.143355522	0.567027057	0.713697334
TACR2	-0.101410132	0.333696835	0.507040538
ACTR6	-0.031171253	0.51640785	0.673593487
TIPIN	-0.001212291	0.982027871	0.990234494
SRI	-0.060551141	0.347413415	0.521373204
EIF4G3	-0.017040764	0.69908791	0.8133144
NUP37	0.069258774	0.225809361	0.390020079
SEMA3A	0.188577718	0.19814162	0.355663185
GTSE1	0.30482047	0.001949893	0.012000564
SEMA3C	0.112405664	0.265642882	0.435657051
TTC38	-0.114717315	0.031067607	0.094357941
ACAT1	-0.14493889	0.029421085	0.090694254
GRAMD4	0.335862472	3.79237E-06	9.14151E-05
CELSR1	-0.095509871	0.175572571	0.327060156
WNT8B	-0.442324298	0.000390953	0.00354004
ZNF638	-0.095836012	0.032651344	0.097907665
SLC25A40	0.03660339	0.442950863	0.611965483
TIMM21	0.052566768	0.238902051	0.40544663
ADD2	0.294801866	0.036020786	0.105275421
FGF4	-0.755404914	0.064514537	0.160310003
RASAL2	-0.056520151	0.408451023	0.580527174
VPS9D1	0.04369944	0.48571149	0.648413707
ZNF37A	-0.118417831	0.04809623	0.129739395
MARK3	-0.046638799	0.209769044	0.37015695
SLC25A3	0.02757824	0.526076962	0.68077794
FNDC3B	0.183444751	0.002961323	0.016481628
FOSL2	-0.081310252	0.239212855	0.405752964
CACNG5	0.480959828	0.094973524	0.211357004
CACNG4	-0.562752112	0.001677983	0.010737057
FRYL	-0.089585892	0.155242138	0.300246656
TMEM131	-0.068650387	0.104573609	0.226247574
FSCN1	0.208532722	0.073255119	0.17587892
ACTB	-0.029700269	0.541165165	0.693611145
MOCOS	0.083669972	0.332267662	0.505578378
PLD1	0.172182693	0.020703509	0.070054531
ATP12A	-0.147275949	0.483002259	0.64591993
WDR62	0.265722242	0.00953024	0.039462294
DLG1	-0.006892083	0.884904045	0.935172663
RAB7A	-0.004745239	0.908347216	0.948477091
BCAP29	-0.04922473	0.348879243	0.522848409
SEC31B	-0.136634341	0.167589032	0.316799605
SART3	0.101464678	0.004165952	0.021279209
ARHGAP15	0.109724376	0.195063841	0.351582781
TUBA3D	-0.257150864	0.00415649	0.021243969
PAX2	-0.25335571	0.343856661	0.517691174
EXOSC7	-0.18356985	1.49472E-05	0.00027209
KIFAP3	-0.042251608	0.328945138	0.502223747
MKRN2	-0.115184667	0.000191094	0.002040011
MCM6	0.06188993	0.376390204	0.549921917
REXO2	-0.137352454	0.001699792	0.010847441
RBM7	0.014727112	0.738124889	0.840451192
RBMS2	-0.143497171	0.008666446	0.036798847
BAZ2A	0.077250495	0.118421476	0.24777922
PTPN23	-0.117410959	0.008250821	0.035545105
MLH1	-0.083557418	0.011469144	0.045335355
UNG	0.141505115	0.014934765	0.055312199
FMO4	-0.108446214	0.148625049	0.291304269
KLHL20	-0.081670396	0.03883699	0.11106953
RGS11	-0.321200703	0.008568677	0.036512197
SLC46A1	-0.097873698	0.092985043	0.208237583
PLXNA2	-0.184527124	0.048395267	0.130263156
SPAG5	0.208863793	0.027201753	0.085627679
ANKRD13A	0.018607426	0.699239436	0.813369753
TPD52	0.21919718	0.005856899	0.027516807
ACACB	0.139655097	0.066583842	0.16410673
TRAF4	-0.071511579	0.218062267	0.380357082
PAG1	-0.364170905	5.0736E-05	0.000707856
GPATCH1	-0.031923741	0.499317795	0.659345542
ICAM3	0.266260651	0.004492141	0.022523103
NT5C2	0.000309199	0.995154821	0.997353197
MCAM	0.164916967	0.042612693	0.11887306
GPC4	-0.295917558	0.001779555	0.011232125
MBNL3	-0.103955993	0.209194919	0.369514401
CAMSAP3	-0.07441897	0.293590631	0.466019676
RAP1GAP	-0.412718536	0.000913725	0.006761282
XAB2	-0.077835028	0.09722276	0.214924183
ARHGEF1	-0.191923165	0.001506167	0.00988169
STXBP2	-0.061115044	0.241440273	0.408562953
MAP2K7	-0.022178491	0.607367394	0.746517456
NMRK2	0.486041499	0.026422206	0.083797388
DGKD	-0.317084029	4.54447E-06	0.0001058
CTTNBP2	0.154543809	0.182125267	0.335449182
ACTL6B	0.030353381	0.886316139	0.935753
RARB	0.195381268	0.016825821	0.060316195
TOP2B	-0.043675503	0.315517451	0.489042207
TM9SF3	0.000120835	0.998033074	0.998789876
NFKB2	-0.013068882	0.832670864	0.903204293
UBE2T	0.22003121	0.019889371	0.067986071
PPP1R12B	-0.090752308	0.290430083	0.462602521
DNAJC10	0.250270151	1.08333E-05	0.000211127
GTF3C1	0.097633177	0.024434616	0.079268939
IL4R	0.194445055	0.000203164	0.002141257
USP33	-0.057845493	0.159880838	0.306536865
PAK3	0.493714857	0.006059724	0.028212356
CAPN6	0.132901544	0.524937966	0.679952772
DCX	0.122332515	0.628432873	0.762358231
SNRPA	-0.076345602	0.108786837	0.232886393
SPAG6	-0.127024249	0.520478696	0.67631323
EXOSC5	-0.255395083	0.000366628	0.003365964
DYNC1I2	0.025616722	0.487169762	0.649612812
APBB1IP	0.306511553	0.000107178	0.001292498
LRCH4	-0.137932515	0.013887119	0.052289716
FAM76B	-0.042283903	0.349155581	0.523206845
SIRT6	0.017008969	0.760043084	0.856018869
TYR	-0.823945396	0.008133799	0.035171012
POLD3	0.055897614	0.175880526	0.327503809
ACTN2	0.14084041	0.296188171	0.468763651
CAPZB	0.008060944	0.849056938	0.913005362
GPR137B	0.40338707	1.21508E-10	1.53638E-08
NAALAD2	-0.206053745	0.025971001	0.082784159
JADE1	-0.216976755	0.003145252	0.017266385
SLC25A43	-0.135483848	0.011118853	0.044295009
UBE2A	-0.021469137	0.638584466	0.769764497
FGFR1	0.217433951	0.017935415	0.0630734
FKBP6	-0.218977273	0.123506811	0.255095595
SMC1B	-0.454943479	0.010795366	0.043279846
FBLN1	0.138877934	0.14320123	0.283515745
ITGA8	-0.096366848	0.350098708	0.524129354
CST7	0.005305832	0.960630273	0.978753623
MAP2	-0.322425607	0.011466701	0.045330124
PIAS2	-0.072304788	0.247344067	0.415302519
AMPH	0.684261162	9.01242E-06	0.000182837
ARAF	0.074486481	0.101853098	0.221987926
MCCC1	-0.292037139	3.59806E-06	8.74803E-05
LAMP3	0.11181836	0.355624873	0.529743206
FAP	0.359018633	0.000619133	0.005025416
NEBL	-0.179962984	0.044610618	0.122857189
ACER3	0.112427291	0.0258831	0.082566912
UBE2K	-0.081840035	0.070628305	0.171217184
PIK3C3	0.043308314	0.391695091	0.564845561
N4BP2	0.008184935	0.909805313	0.949294916
TIGAR	0.111060549	0.031441194	0.095225511
TULP3	-0.059125502	0.210188747	0.370556926
SYNJ2	0.24796225	9.74058E-05	0.001200012
ADCY2	-0.604078706	8.45299E-05	0.001073967
PPP2R5C	-0.196806116	8.72529E-07	2.79792E-05
PMS2P1	-0.145247144	0.023071167	0.075930604
RBFOX1	2.101423805	5.1205E-11	7.16056E-09
GNB1	-0.013924566	0.713255414	0.823225964
HOXA9	0.294692039	0.048288857	0.1300621
EDN1	-0.18765509	0.079461987	0.186280246
MLLT10	-0.138372548	0.001229902	0.008476051
ZCWPW1	-0.472139522	1.17237E-11	1.89699E-09
ADCYAP1R1	0.428830886	0.000214055	0.002224947
FGF20	-0.016885708	0.926971143	0.959294404
P2RY10	0.144518568	0.169800915	0.319664433
ITM2A	0.018744103	0.830602268	0.901713978
NRDC	-0.015370886	0.687370661	0.805310781
VDAC3	-0.015797277	0.813542362	0.890332586
PCM1	0.183356476	0.005708707	0.026984591
TNRC6C	0.010942322	0.862405081	0.921215204
CBFA2T2	0.060215267	0.268338782	0.438676097
BRINP1	-0.15849712	0.49550606	0.656216153
ITCH	-0.057202988	0.200336626	0.35839439
PKD2L2	-0.383772363	0.001472438	0.009719284
TP53INP2	0.171774381	0.024161022	0.078677483
SDF4	-0.020999648	0.674340777	0.796007482
MYH7B	-0.423354034	5.81086E-05	0.000789843
BPIFB2	2.503080871	9.58033E-20	5.94995E-17
TP73	0.061988516	0.549813457	0.700211753
TOLLIP	-0.083482505	0.060712443	0.153447621
UBE2D4	-0.082809075	0.059074183	0.150562516
CLUL1	-0.228113814	0.093943286	0.209660881
RUNX1T1	0.055286245	0.578218975	0.722679602
CDH17	1.202696276	7.74431E-08	3.80299E-06
THOC1	-0.033348032	0.525254976	0.680196496
FKBP7	-0.005122761	0.929708239	0.960784964
OSBPL6	0.012561582	0.912552292	0.950947059
SLC1A3	0.156228085	0.115484706	0.24322512
XRCC5	-0.002738571	0.942638709	0.968235316
LXN	0.294843198	1.02101E-05	0.000201305
SP140	0.219340168	0.021347049	0.071714944
MKNK1	-0.005395532	0.886455523	0.935802766
TNS1	0.038994686	0.621112577	0.756847664
REXO1	0.018083628	0.72043879	0.828129093
SAR1A	-0.084307604	0.012196664	0.047416876
CDC14A	0.019849339	0.78237401	0.870582541
RAPGEF3	0.078851688	0.354142701	0.528253446
CEACAM1	0.269989115	0.005303904	0.02555556
SENP1	0.124989592	0.005251388	0.025366191
DUSP13	0.421659453	0.062687428	0.157088676
CIC	-0.015371014	0.76997389	0.862620078
LIPE	0.003677976	0.965762333	0.981906122
FDFT1	-0.072112937	0.301238062	0.474325559
PAFAH1B3	-0.028781265	0.731160022	0.835656682
OPHN1	-0.046886219	0.555305771	0.704423685
AFM	0.439106486	0.112289143	0.238277313
KIF22	-0.010941564	0.85058433	0.914027564
SCGN	1.583877239	3.13034E-09	2.55214E-07
CARMIL1	-0.18409775	0.001421931	0.009473257
PGM1	0.01058784	0.853044803	0.915612244
DDX1	-0.069169046	0.088847351	0.201828914
DNM2	-0.047762985	0.261044742	0.431063207
EPB41L2	0.238071749	0.001080534	0.007660321
RIMS1	0.105363328	0.579392815	0.723589938
MOXD1	0.157762703	0.092305489	0.207133125
STX7	0.01252878	0.786896493	0.873130309
RABL2B	-0.03487085	0.533145077	0.686519398
KEAP1	-0.032948137	0.544381157	0.696129037
DDX43	-0.294189826	0.098463313	0.216877214
PTPRH	-0.021111134	0.888903689	0.937098867
DCT	-0.395342696	0.008115375	0.035122825
SLC35C2	-0.081736816	0.05703441	0.146727413
CRYBG3	0.107168415	0.250729647	0.419246968
EPHA6	-0.185296388	0.378612606	0.551878218
SCTR	-0.201841194	0.240454113	0.407383885
RFX3	-0.02169722	0.796629133	0.879142862
RIF1	0.00180276	0.974938499	0.986643644
RAB21	-0.012574725	0.783375995	0.871021569
SLC4A4	-0.082320892	0.515918143	0.673081441
SMARCA2	-0.074058071	0.224018943	0.387641072
RDH8	0.821905577	0.003154059	0.017298992
SESN1	-0.045443575	0.487414395	0.649762776
MID2	0.173041792	0.01053396	0.04249405
DNAAF6	0.061104575	0.784434093	0.871703521
COL5A3	0.352977431	0.000868027	0.006502043
SRCAP	0.02358491	0.525947333	0.68065479
PUM3	-0.120900172	0.026496216	0.083957698
CPB2	-0.532506695	0.011633649	0.045820512
CHRNA3	-0.01954418	0.884322005	0.935011684
KCNN2	0.268537234	0.007912626	0.034482097
CNOT4	-0.090232947	0.012298634	0.047690379
PSEN1	-0.012380252	0.725674915	0.8317421
CPOX	0.0196859	0.719927494	0.827792152
CLDND1	-0.003802383	0.939358992	0.966501217
MOK	-0.150068362	0.038026122	0.109298251
HSP90AA1	0.094113443	0.094223559	0.210142022
RBL1	0.080283193	0.215380779	0.37709718
DLGAP4	0.084346249	0.091294185	0.205606657
IGSF9B	-0.072857404	0.61869496	0.755209132
CFHR2	0.244250854	0.924020384
CROCCP3	-0.084721382	0.336965244	0.510464028
NDC80	0.188300235	0.071297128	0.172432729
AP4E1	0.027490458	0.548120955	0.698970585
RSBN1	-0.105762938	0.024229922	0.078822835
MAGI3	-0.427567466	1.03267E-07	4.81364E-06
CXCL2	0.554376371	4.10755E-06	9.76195E-05
AFP	1.72391566	1.23203E-09	1.16141E-07
COL4A4	-0.385069697	0.000381357	0.003468016
TCF7	0.014811782	0.849810071	0.913466337
OSTM1	0.172240128	0.000804043	0.006105061
CDH7	0.69008343	0.005300184	0.025541085
IMPG2	-0.049503458	0.625914989	0.760155341
PCNP	-0.08824223	0.036776473	0.106774647
EXD2	0.065003106	0.100676849	0.220114027
ARG2	0.401393631	0.000186715	0.002000845
MEF2C	-0.236051412	0.004058062	0.020879639
PTPRC	0.324358335	0.000652828	0.005239494
CACNA1S	0.82652464	1.41568E-05	0.00026051
PKP1	-0.589392914	0.005721746	0.027026147
UBA5	-0.034923251	0.383071838	0.556572397
STK17B	-0.122883392	0.052510784	0.138351453
CDC14B	-0.041159221	0.464572766	0.630234719
ZNF510	-0.044656508	0.344278743	0.518012679
LRP2	0.50157539	0.005199572	0.025193705
ZNF506	-0.090309512	0.211312216	0.371823571
JMJD4	-0.007600842	0.879805583	0.932231369
DUSP12	-0.033267765	0.427548368	0.59786837
AACS	0.296397742	4.71919E-07	1.70052E-05
DELE1	-0.071944719	0.093826194	0.209488122
SLC13A1	-0.068470623	0.83741501	0.906371529
CADPS2	0.023085023	0.740409222	0.841921439
PCDHB4	0.094943001	0.283667366	0.455247585
PCDHA6	0.497946025	0.003981094	0.020574652
PCDHGA2	0.047326103	0.710380207	0.821376507
HSPB11	-0.154251466	0.002489536	0.014465027
PHLPP1	-0.138492792	0.033393775	0.099512129
ATP8B1	0.099188746	0.23030042	0.395328827
IL12RB2	0.545670754	4.10777E-05	0.000603403
SMARCD3	0.030626788	0.711602147	0.822249087
WDR70	-0.086653812	0.059994341	0.152136484
FYB1	0.24479244	0.010062965	0.041110849
MPP4	-0.302347194	0.011036893	0.044047444
STRADB	-0.262055859	7.52562E-06	0.000158911
BZW1	0.040876237	0.489725987	0.651589675
PGR	-0.305542448	0.007566671	0.033346097
C1QTNF3	0.432183456	0.000173066	0.001884223
ME2	-0.019617832	0.693591989	0.809612407
C5orf22	-0.045187877	0.382234898	0.555757908
CCNT2	-0.107732107	0.015295644	0.056283491
FAM135A	0.004651671	0.947674257	0.971215165
COL19A1	-0.160918619	0.315338255	0.488857819
EPB41L3	0.249975219	0.007503614	0.033123512
COBLL1	-0.247503277	0.000731816	0.00569802
DLG3	0.040803036	0.39798331	0.570465428
KCNK2	0.258540781	0.183767892	0.33742981
SERTAD4	-0.014088506	0.894982513	0.940622474
TRAF5	0.125664568	0.090339349	0.204022
MRPL22	-0.04056534	0.448160713	0.616201261
GEMIN5	0.012172047	0.782541009	0.870631759
OPRK1	-0.232444103	0.357719925	0.531646372
NFE2L1	0.046149988	0.318529132	0.492084804
SEMA5B	0.457296845	0.000151264	0.001699884
GSK3B	0.032558095	0.450880786	0.618663664
ITGB5	0.10404478	0.103842513	0.225173393
ERC1	0.03574037	0.531026694	0.684940423
XPO1	-0.050790503	0.213499904	0.374689492
LINC01587	0.171386352	0.369865536	0.543427097
RNF13	0.028228059	0.542223798	0.694525353
TRPM3	0.735901173	8.68804E-07	2.79021E-05
PALB2	0.016678046	0.676354612	0.797559837
DOP1A	0.089626333	0.150444363	0.2937522
LYRM2	-0.006669688	0.878393909	0.931343681
BCKDHB	-0.220253786	1.15639E-05	0.000222187
KAT6A	0.097543863	0.108134624	0.231849593
TUT7	-0.072226713	0.172881416	0.323516836
ULK2	0.057607235	0.305097548	0.478103486
GRHL2	-0.142181948	0.020564254	0.069672651
TNPO1	0.012897772	0.804004101	0.884129704
PLOD1	0.076989975	0.206457638	0.366108183
P2RX5	0.033108634	0.773538916	0.864921776
ITGAE	0.059713136	0.338008681	0.511457636
DIS3	-0.072800115	0.083565873	0.193145466
PIBF1	-0.161401971	0.001660844	0.01065872
TDRD3	-0.119187537	0.016811411	0.060281613
AC000061.1	-0.804923774	0.001694817	0.010826729
NUFIP1	-0.126755383	0.002759374	0.015614882
PDS5B	-0.031229913	0.523641811	0.678940223
OXCT1	0.048126335	0.613815804	0.751480999
RRAGB	0.003666781	0.930670358	0.961380351
EPYC	0.695154579	0.001824082	0.011417613
CYLD	0.069695063	0.195733451	0.352337585
SLC27A5	-0.270204965	0.000664325	0.005308567
ZNF324	-0.075214811	0.063215432	0.158046065
ZNF671	-0.080254318	0.258224415	0.427744008
ZNF416	-0.016834212	0.740340882	0.841889066
ZNF586	-0.140739066	0.010540162	0.042506889
ZNF446	-0.079589258	0.08486011	0.195249914
ZNF264	-0.129938761	0.019383301	0.066736961
RPS5	-0.257126921	0.001678809	0.010740715
FAT1	0.245558434	0.011102876	0.044239708
YTHDC1	-0.084928047	0.002018928	0.012331527
CHMP2B	-0.078716443	0.096939191	0.214476945
SMAP2	0.038034926	0.475048419	0.639351157
PPIE	-0.034403602	0.423713642	0.594476146
ZMPSTE24	0.038551763	0.383943075	0.557454669
STARD7	-0.030293213	0.387188972	0.560346718
NOA1	-0.177048371	3.27186E-05	0.000506143
REST	-0.041851569	0.384395716	0.55783283
HAL	0.674089878	5.01621E-05	0.000700777
SSH1	0.151009123	0.002514286	0.014569026
GSTP1	-0.216468708	0.007492835	0.033079388
APLP2	-0.214280577	0.000709395	0.005573796
FAM234B	-0.150788999	0.039646261	0.112803403
SLCO1A2	-0.224020893	0.340400562	0.514082268
WBP11	0.041954603	0.381452399	0.554835972
EIF3I	-0.11643545	0.020665063	0.069969288
NKAIN1	0.587301482	0.001183107	0.008225118
COL16A1	0.239175826	0.00479097	0.023659054
TXLNA	-0.024029413	0.479585453	0.642999869
APOB	0.983806489	6.73511E-07	2.26643E-05
NCOA1	0.12376804	0.015709429	0.057348591
AGBL5	-0.111095146	0.023127699	0.076057388
EFR3B	0.029181089	0.81036812	0.888505801
KIF3C	0.344672577	0.00054218	0.004553968
RAB10	0.077886857	0.115625567	0.243444784
GCKR	0.138266453	0.431082814	0.601019755
HADHA	-0.068471933	0.057695394	0.147977157
MAPRE3	-0.076782603	0.254522474	0.423739234
CAD	-0.027829518	0.660053898	0.785465382
CD59	-0.187755222	0.00944173	0.039207784
CD82	0.1439835	0.077592252	0.183290972
BCORL1	-0.029717394	0.627438687	0.761502159
ATRX	-0.005983755	0.918594563	0.954437967
AK6	-0.007927109	0.83945066	0.907627149
FCN1	0.479726502	5.21357E-05	0.000722848
MYNN	-0.06726852	0.169933054	0.31987042
MECOM	-0.499947933	1.11806E-06	3.39943E-05
SCAMP1	-0.073767028	0.159055457	0.305669144
PREP	0.05003664	0.237483769	0.403630656
HACE1	0.025888859	0.651426863	0.779059317
SEH1L	-0.072556803	0.161015092	0.308051505
WDR47	-0.031729784	0.478578221	0.642077496
WDFY1	0.003504717	0.938028012	0.965747679
OVGP1	-0.445892034	1.32273E-05	0.000247487
SLC25A24	-0.101435027	0.097297982	0.215067956
MAP3K4	0.01015867	0.813755546	0.890439803
PILRA	0.322867309	0.000149308	0.001682832
IGSF9	0.111369593	0.283272515	0.454769439
ABCB1	0.345828227	0.000717743	0.00562314
ZNF213	-0.046768787	0.388822226	0.562007676
AKR1B1	0.194999172	0.074790042	0.178491408
CPNE3	-0.062442171	0.236299927	0.40226559
RRN3	-0.030919519	0.430443781	0.600443481
CTTN	-0.196186666	0.000111469	0.001332082
WNT11	0.164077356	0.222461349	0.385688562
MTIF2	-0.000941858	0.980976517	0.989751145
DDHD2	-0.006716568	0.916728002	0.953389898
TTC39A	-0.02578742	0.778701498	0.86836515
EPS15	-0.076613778	0.039832371	0.113209772
ORC1	0.196868662	0.047315122	0.128205585
MGST2	-0.041442079	0.466158362	0.631858007
CHERP	-0.026044477	0.589884648	0.732189291
ATG16L1	-0.132650889	0.00054092	0.004546095
USP40	-0.147931405	0.001369373	0.009210153
POMGNT1	-0.135642782	0.003371578	0.018127114
RAD54L	0.211906345	0.036946483	0.10710625
MAST2	-0.077686676	0.153554966	0.298023647
DNAJA1	0.05944539	0.215531461	0.377298432
B4GALT1	-0.054093996	0.381378436	0.554799149
CHMP5	-0.146368423	0.005687787	0.026898836
NFX1	-0.093323049	0.020575337	0.069704608
AQP6	0.784121599	2.02015E-05	0.000343353
DIMT1	-0.032201963	0.440970555	0.610361122
IPO11	0.025231072	0.60669274	0.745998434
FOLH1	0.604379172	8.2444E-09	5.90758E-07
EIF2AK1	-0.060684033	0.178359642	0.330546095
NME8	-0.171411577	0.098577449	0.2169762
EPDR1	-0.593554812	3.31537E-09	2.67204E-07
SNX10	0.234628783	0.006407567	0.029365639
SEPHS1	0.058302075	0.158800019	0.305365742
MRPL28	-0.053942383	0.351387285	0.525519748
HBQ1	-0.394558114	0.085318881	0.196049131
ITPKC	-0.195115121	0.004519289	0.022624303
CEACAM6	-0.068164025	0.609217752	0.747964536
FAT2	0.420691619	0.025465144	0.081627626
RBM22	0.017113605	0.57164863	0.717632203
TMED2	0.211738978	0.000103284	0.001256345
ERO1B	0.204803144	0.092638792	0.207671398
ZFAND6	-0.110413017	0.012194652	0.047413416
HSD17B2	0.110596152	0.595154669	0.736457909
TXLNG	0.020207425	0.655200418	0.781610081
PPEF1	0.23521785	0.056733837	0.14622237
LAT2	0.279632661	0.000292295	0.002831354
HUWE1	0.060999127	0.239426022	0.406032998
ZW10	-0.010847212	0.801007315	0.881974734
ALG9	-0.007551265	0.916132637	0.953088153
MYBPC2	0.238002404	0.080727547	0.188390242
NOX4	0.156011376	0.117078605	0.245736477
ACOX3	-0.111080078	0.026205205	0.083323161
MTMR2	-0.136099733	0.008043606	0.034894459
PPP1R15A	-0.0495874	0.459113895	0.625366452
HSD17B14	0.00061774	0.995280351	0.997411287
TRIP6	-0.407158146	2.28637E-07	9.43871E-06
ACHE	0.807402747	1.51721E-07	6.68143E-06
FTL	0.016550384	0.84369238	0.910292311
SRRT	-0.013602634	0.764535155	0.859209668
BAX	0.042638432	0.41379401	0.585573042
NLK	0.007361871	0.8554697	0.917200252
PIGS	0.062151926	0.198296317	0.355806969
ADAMTS2	0.301072462	0.001896184	0.011759123
TMPRSS11E	-0.221056904	0.294767145	0.467219864
ATXN7L3	0.00498298	0.902333448	0.945075794
PGS1	-0.053714641	0.23303087	0.39859699
PSMC5	-0.108285509	0.0141807	0.053123457
UIMC1	0.016347092	0.646732363	0.775658878
CETP	0.239889913	0.000988131	0.007180104
MMP2	0.224540653	0.019299776	0.066530743
MT3	0.721307264	0.000104091	0.001263575
LPCAT2	0.124279825	0.086710745	0.198495838
GNAO1	0.41664155	0.000197056	0.002090448
OGFOD1	-0.038090153	0.285666296	0.457362987
SH3BP2	0.102144194	0.054567415	0.14219987
NOP14	0.002365157	0.956684784	0.976264632
ADD1	-0.010486088	0.749713348	0.848798834
L2HGDH	-0.046802244	0.420486257	0.592011456
TXNDC16	0.160738585	0.023561065	0.077140157
RTRAF	-0.036168205	0.427461129	0.59778172
NID2	0.414002205	4.40568E-05	0.000633721
GMCL1	-0.035949355	0.389029306	0.562268502
SF3B2	-0.07829232	0.038382457	0.110120104
KLHL42	0.211502148	0.000217193	0.002250368
GNAS	-0.143538543	0.012558514	0.048431299
DNM1L	0.155409576	0.003903296	0.020276014
PTHLH	0.744799834	5.09134E-06	0.000116163
PHACTR3	-0.543182492	0.003160925	0.017325394
ERGIC2	0.120919493	0.027464328	0.086255188
TFAP2C	-0.196795649	0.027566617	0.086481042
AURKA	0.329441825	0.000985383	0.007167534
CASS4	0.174487997	0.046021637	0.12576587
PIR	-0.233875845	0.039556758	0.112601847
AAMDC	-0.093625118	0.086411207	0.197977438
RFX2	0.046244408	0.560151526	0.707912716
METTL2A	-0.070913604	0.122899417	0.254425892
SULT2B1	-0.458045501	0.000370478	0.003392458
ALG6	0.011781474	0.793232243	0.877068798
CNOT3	-0.044260178	0.354947036	0.529069396
GP6	-0.018167698	0.896070246	0.941317313
PTPN4	-0.19890812	0.001774152	0.011208073
DDX18	0.009828883	0.802869151	0.883218807
KHSRP	0.045629379	0.319774576	0.493196987
GNA11	0.043186354	0.350106296	0.524129354
ASAP3	-0.007211874	0.924201502	0.957534255
EDEM2	-0.020722591	0.677919594	0.798624795
DNMT3B	-0.037355672	0.710089037	0.821107284
REM1	0.097228871	0.256099726	0.425400641
TPX2	0.138145191	0.219824584	0.382377622
FER1L4	-0.374416897	0.005740704	0.027106597
PDRG1	0.028060313	0.634967334	0.767305604
EPB41L1	-0.223209502	0.000201412	0.002126507
SLC15A1	0.53010871	0.010086921	0.041186391
DOCK9	-0.144688414	0.042319945	0.118313565
ANKRD10	-0.036699619	0.55989774	0.707676693
TGDS	-0.049475331	0.350499821	0.52454874
DOCK3	-0.391572133	0.002597534	0.014929102
C3orf18	-0.183397976	0.002813458	0.01583993
COQ9	0.040447976	0.423159645	0.594114078
TMEM40	-0.108709172	0.473600894	0.638095804
KIF9	-0.201040953	0.000426236	0.00379044
ARHGAP28	0.141428383	0.140231258	0.279390785
CRLS1	-0.075559388	0.265104824	0.435123976
DEFB127	-0.265332926	0.851964567
PPP1R13B	-0.067180378	0.337244134	0.51068501
ATRN	0.029296896	0.569399424	0.715723449
SMOX	0.197360369	0.054814967	0.142712884
SIGLEC1	0.55302487	8.14854E-08	3.95097E-06
FKBP1A	-0.016877756	0.67468177	0.796254206
NSFL1C	-0.058819305	0.160242696	0.307002092
SLC4A11	0.148352179	0.270866289	0.441498461
C20orf194	-0.015351697	0.791621862	0.876140638
ZNF343	-0.023887437	0.597833044	0.738560337
EBF4	0.106815877	0.259360524	0.429268961
CPXM1	0.418621596	0.000215116	0.002234331
MAVS	-0.049021989	0.298192816	0.470889923
LZTS3	-0.072753989	0.368551027	0.542210021
F11	0.313409338	0.141875353	0.281815526
XRN2	0.096281436	0.029745391	0.09145365
KIZ	-0.203981173	1.35331E-05	0.000251674
DYNLL1	0.030835397	0.525868876	0.680594967
TESC	0.312244207	0.081223007	0.189273853
SNX5	-0.159488075	8.87219E-05	0.001116812
RPL6	-0.09606941	0.071249718	0.172354622
SIRPG	0.124313019	0.233028403	0.39859699
MAPKAPK5	0.016835212	0.646430903	0.775437991
P2RX7	0.37512021	2.81929E-05	0.000448116
ESF1	-0.036154555	0.487912569	0.650139572
RBBP9	-0.147725	0.005340115	0.025683148
ANAPC5	0.022689387	0.556555629	0.705415886
SLC23A2	0.0773157	0.203269726	0.36209242
SLC8B1	-0.013001025	0.792909834	0.87694561
TMEM230	-0.124053627	0.008109101	0.035110302
DZANK1	-0.069346046	0.258416108	0.42797761
KDM2B	0.132335859	0.000796065	0.006061923
CFAP61	0.174675312	0.260930684	0.430925412
LHX5	-0.084767733	0.74129351	0.842541312
TASP1	-0.052032305	0.252342923	0.421206527
OAS1	0.303012381	0.001957102	0.012032656
GCN1	0.109821951	0.027277218	0.085812044
RPLP0	-0.087168573	0.218206161	0.380507379
PXN	-0.081840294	0.173351149	0.32413733
SIRT4	-0.06455352	0.3313956	0.504724259
RPH3A	0.134453627	0.36597947	0.539704063
KIF16B	-0.051032932	0.369673355	0.543330031
TRMT6	0.021087641	0.691807556	0.808459597
CHGB	3.305967439	3.90169E-50	2.74627E-46
PEBP1	-0.077558525	0.1671131	0.316069704
TBX5	-0.08219194	0.344063478	0.517875893
BRAP	0.020279728	0.543038081	0.695158215
ERP29	-0.051835493	0.417890069	0.589483094
NOS1	-0.147624842	0.435688976	0.605283622
FUS	0.02006575	0.625867253	0.760141085
IGBP1	-0.126295782	0.009904418	0.04063621
FXYD5	-0.007251861	0.934005414	0.963534225
ZNF302	-0.002076929	0.968384446	0.983120073
GRAMD1A	0.141466821	0.043312998	0.120270533
FXYD3	-0.170442428	0.22266655	0.3859484
HEPH	0.05716835	0.56219145	0.709556478
CDIP1	-0.03522628	0.589537336	0.731865745
CMTM1	0.169644599	0.016658945	0.059860508
KCNH4	0.485069476	7.46939E-06	0.000158025
GANAB	0.058410189	0.19939984	0.357202717
GMIP	0.08250436	0.080357384	0.187795531
RBM41	-0.021701789	0.676327418	0.797550038
BIRC5	0.189659215	0.093761452	0.209413213
LAG3	0.080182323	0.492465594	0.653770688
MLF2	0.024400715	0.678745205	0.799240694
OTUB2	0.140310288	0.067292549	0.165447919
DDX24	-0.013860861	0.712470028	0.822712706
ZBTB25	-0.1561777	0.004671692	0.023189341
NECAP1	-0.007280331	0.86914162	0.925366532
ARHGAP4	0.029439414	0.721905292	0.829321155
ANKRD24	-0.453965533	6.28245E-05	0.000841592
DHX32	0.029748112	0.603756484	0.743637536
RCOR1	-0.130817038	0.011736186	0.046067722
GPATCH2L	-0.010181499	0.863810885	0.921875601
LTBP4	-0.033866951	0.694549328	0.810318415
BLVRB	-0.171758974	0.057352408	0.147330104
SLC9A1	0.004066181	0.954134683	0.975052411
SPTLC1	0.033016413	0.439959224	0.60946572
PAPOLA	0.026290252	0.563903214	0.71101572
CCNK	0.03618463	0.458151223	0.624727339
PCBP4	-0.184031306	0.002414676	0.014139824
RGS1	-0.181619058	0.096751362	0.214184805
YPEL3	-0.245234514	0.00021811	0.002257937
MRPS33	-0.055187594	0.359416043	0.53337755
NDUFB2	-0.065051859	0.249142946	0.417515373
NUDC	-0.042918953	0.395190871	0.567908699
MAEA	-0.068810125	0.081236545	0.18928451
ICAM1	-0.273146451	0.006150549	0.028531413
STRN4	-0.015734013	0.751878592	0.85015627
IRAK3	0.581324546	9.69178E-08	4.55794E-06
LYZ	0.263038237	0.03998235	0.113545466
SI	0.350049437	0.466976671	0.632682904
MUL1	0.059694083	0.182402368	0.335798465
TFAP4	-0.048782595	0.34367488	0.517509718
PDCD7	-0.008739112	0.768039193	0.861628781
SPG21	0.006923084	0.846417194	0.911489684
FETUB	0.04730959	0.841849247	0.909213549
DNAJB11	0.156595748	0.000987297	0.007176507
P3H2	-0.426237219	0.002244068	0.013368807
THPO	0.83858703	1.52518E-06	4.42489E-05
CHRD	0.427958288	0.000882657	0.00658942
FLT3LG	0.02696817	0.698255651	0.812791331
RAB11FIP3	0.097203509	0.102797968	0.223604705
GNPTG	-0.193990212	0.000388297	0.003519758
ZNF268	-0.03853221	0.423622065	0.594468773
GOLGA3	0.049202584	0.32441336	0.497806928
PABPC4	-0.040128489	0.37045175	0.54403861
CD209	0.605923916	2.67929E-08	1.58476E-06
CERS4	0.160536752	0.106520877	0.229488452
MCOLN1	0.172255259	0.001014298	0.00731897
USP48	-0.067305808	0.076822369	0.181960868
EFNB1	0.156157654	0.097389475	0.215218552
PDPR	-0.012007951	0.829985225	0.90131786
AARS1	0.080865326	0.128185375	0.262168859
GLG1	0.085565167	0.047924914	0.129399702
KIF4A	0.250042728	0.019926754	0.068075284
TNRC6A	-0.031517314	0.526743191	0.681401327
PLEKHG2	0.193718548	0.037123214	0.107485778
DLL3	2.178016482	5.6779E-22	4.99561E-19
NAT14	-0.254872317	0.00044259	0.003889197
PITPNM2	-0.000778793	0.991309171	0.99523344
EXOC1	-0.088526124	0.019959838	0.068163369
RBM27	-0.05252686	0.177603813	0.32963742
POU4F3	-0.34041155	0.033665697	0.10014979
OSBPL8	0.109079856	0.0613696	0.154648903
DTX2	-0.098856993	0.183301425	0.336924869
NLRC4	0.43844915	1.98587E-08	1.23153E-06
PUS7	-0.141989768	0.017503767	0.062030636
LAMB4	0.153479321	0.182678536	0.336112864
NRCAM	0.435850602	0.003020845	0.016720357
LAMB1	0.182657051	0.018202912	0.063785711
SLC26A4	2.502925946	9.19579E-45	4.85446E-41
SLC26A3	-0.535930061	0.006273941	0.028925981
DLD	-0.01843176	0.701321903	0.814717132
WDR7	0.063599284	0.202313718	0.360801615
TXNL1	-0.032923379	0.527998118	0.682400904
IL5RA	0.085425664	0.578780679	0.723060661
ABCC6	-0.262351041	0.007060953	0.031639063
CMTM6	0.028988866	0.52937016	0.68338817
ITGA6	0.183183963	0.108573174	0.232565545
RAPGEF4	0.306833302	0.000225064	0.002318265
MAP3K20	0.049688765	0.455819908	0.622902742
SMPX	0.234740121	0.222068236	0.385180949
FH	0.123758711	0.010708022	0.043011335
SEL1L3	0.098901111	0.093627982	0.209286386
TF	1.349729779	2.20614E-10	2.57375E-08
CDV3	0.090598911	0.038458799	0.110256738
MYO15A	-0.137675401	0.127914722	0.261767435
ALKBH5	-0.043974478	0.262107772	0.432159578
APOH	0.178277686	0.348707987	0.522750511
NLRP1	0.041437525	0.630190947	0.763723664
PITPNM3	-0.407346704	1.35308E-06	3.99603E-05
SPAG7	-0.146127527	0.006273768	0.028925981
ORC6	0.277360889	0.002500561	0.014509991
ZFHX4	0.090471577	0.559068333	0.707180002
SLC17A6	-0.059911751	0.925858778
CPA1	0.030485144	0.878799535	0.931539419
ZC3HC1	-0.077102081	0.078542092	0.184790508
ESR1	0.103128054	0.459862114	0.625975722
RGS17	0.341545644	0.006956745	0.031294979
ANGPT2	0.488876499	4.96336E-06	0.000113858
TMEM101	-0.242203532	1.89075E-05	0.000327657
CD200	0.368172718	2.56057E-07	1.03482E-05
CCDC80	0.403127059	9.45959E-05	0.001173957
CMA1	-0.178850131	0.262880059	0.432993396
PSME1	-0.038162603	0.514038939	0.671540585
PPP2R3C	0.073026178	0.229502017	0.394430415
HAUS4	-0.093508309	0.109070662	0.233276219
JPH4	0.142398357	0.150291414	0.293534986
MYH7	1.037301007	2.24037E-07	9.27602E-06
CEBPE	0.924690776	1.82867E-14	5.32609E-12
SLC7A8	0.272051647	0.01815542	0.063650978
OSGEP	-0.12845679	0.006439942	0.029456476
SLC22A17	0.009969601	0.92367619	0.957245046
RNF31	0.054658749	0.222853687	0.386085714
SCFD1	-0.048846066	0.311034388	0.484404774
G2E3	-0.062770185	0.389237746	0.562492763
HECTD1	-0.031281054	0.558145439	0.70648936
HNRNPC	-0.04803699	0.224647815	0.38853823
RPGRIP1	-0.053724936	0.457890381	0.624499486
SUPT16H	-0.02577332	0.592281754	0.73406436
TOX4	-0.080792485	0.017690674	0.062467604
GEMIN2	0.054213245	0.477137851	0.640859188
TGM1	0.117476957	0.207047613	0.366749215
TINF2	0.033252131	0.390473179	0.563641634
DAZL	0.032828684	0.859933533	0.919852915
TBL1Y	0.283612296	0.435731854	0.605320485
SEMA6A	0.125315565	0.210138459	0.370499203
TRPM7	-0.108517557	0.047914716	0.129387973
TYRO3	0.029901109	0.719926704	0.827792152
WDR76	0.127230614	0.081691498	0.190026273
CAPN3	-0.133706242	0.270131523	0.440710159
SNAP23	0.013538907	0.731188053	0.835666103
TBX15	0.927109013	3.73944E-10	4.16686E-08
PHGDH	0.264349597	0.046302947	0.126322096
COL9A3	0.211932063	0.092026792	0.206687685
EZR	-0.318537731	3.56243E-07	1.35662E-05
MYL6	0.053494042	0.36946174	0.543113517
AGO1	-0.044553115	0.326343722	0.499835645
TEKT2	-0.021279071	0.897000667	0.941898011
CLSPN	0.322646688	0.002191437	0.013142398
RFFL	0.059592885	0.241954462	0.409046619
UNC13D	-0.247202952	0.012982967	0.04965106
MFSD11	-0.013043046	0.757685986	0.854457917
DPYSL2	-0.128613726	0.086737611	0.198542157
TGFB2	-0.150099005	0.214737683	0.376251995
GPATCH2	-0.063543437	0.212882969	0.3738709
NUP50	-0.010239274	0.804826201	0.884655393
CDC45	0.131942462	0.207504533	0.367296677
COMT	-0.194182176	0.002586498	0.01487377
ADA2	0.185971513	0.022645838	0.074933718
AC016026.1	-0.254766374	0.068749185	0.167982849
VNN3	0.451299933	0.005529772	0.026338143
ECHDC1	-0.212147101	0.000276487	0.002719917
LRRFIP2	-0.150486367	0.000100922	0.001235402
[truncated: 54,494 more rows]
