# Supplementary material for: Novel Circulating Tumour Cell-Related Risk Model Indicates Prognosis and Immune Infiltration in Lung Adenocarcinoma
Source: J Immunol Res. 2022 May 29;2022:6521290. doi: 10.1155/2022/6521290 (PMC9168189; doi:10.1155/2022/6521290)
Supplement: Supplementary Materials — The following are the supplementary material to this article: Supplementary Data 1: Data for Figure 3(f) heat map. Supplementary Data 2: Data for Figure 6(a) volcano plot. Supplementary Data 3: Data for Figure 6(b), S6 GO and KEGG. Supplementary Data 4: Data for Figure 6(c) circle diagram. Supplementary Figures: Supplementary Figure S1: The cluster tree shows the similarity between 22 DEGs. Supplementary Figure S2: KM curve displays the survival possibility for the 4 candidate genes' low and high expression groups. Supplementary Figure S3: ROC curve considered risk score and other prognostic factors in TCGA-LUAD data. Supplementary Figure S4: Unsupervised clustering of 4 DEGs expressions in GSE72094 (A) and GSE42127 (B), while the tumor stage, smoking history, and risk score are used as patient annotations. Supplementary Figure S5: Validation of the CTCR Model in the GSE42127 dataset (n = 132). Supplementary Figure S6: Bar chart derived from KEGG analysis. Supplementary Figure S7: The immune cell infiltration landscape in GSE42127 dataset (n = 132). [file 6521290.f1.zip › Supplementary Data 3_data for GO and KEGG.txt]

ONTOLOGY	ID	Description	GeneRatio	BgRatio	pvalue	p.adjust	qvalue	geneID	Count
BP	GO:0019730	antimicrobial humoral response	25/416	122/18670	2.22836E-17	7.39147E-14	6.66163E-14	KLK3/CHGA/DEFA3/DEFA5/DEFB4A/F2/FGA/FGB/CXCL1/PF4V1/PGC/PI3/PLA2G2A/PPBP/REG1A/S100A7/S100A8/S100A12/CXCL5/SEMG1/SPAG11B/BPIFA1/PGLYRP4/BPIFB2/SPAG11A	25
BP	GO:0061844	antimicrobial humoral immune response mediated by antimicrobial peptide	18/416	73/18670	2.27629E-14	3.77522E-11	3.40245E-11	KLK3/DEFA3/DEFA5/DEFB4A/F2/CXCL1/PF4V1/PGC/PPBP/REG1A/S100A7/S100A12/CXCL5/SEMG1/SPAG11B/BPIFA1/PGLYRP4/SPAG11A	18
BP	GO:0006959	humoral immune response	32/416	356/18670	2.30745E-11	2.55127E-08	2.29935E-08	KLK3/C5/C8A/C8B/CHGA/CPN1/DEFA3/DEFA5/DEFB4A/F2/FGA/FGB/CXCL1/IL1B/PF4V1/PGC/PI3/PLA2G2A/PPBP/REG1A/S100A7/S100A8/S100A12/CXCL5/SEMG1/TNF/VTN/SPAG11B/BPIFA1/PGLYRP4/BPIFB2/SPAG11A	32
BP	GO:0070268	cornification	15/416	112/18670	2.82163E-08	2.33983E-05	2.10879E-05	KRT13/KRT31/KRT33A/PI3/SPRR2A/SPRR2E/SPRR2F/KRT23/KLK13/KLK14/KLK12/KRT20/KRT40/RPTN/DSG4	15
BP	GO:0097529	myeloid leukocyte migration	20/416	210/18670	5.35828E-08	3.55468E-05	3.20369E-05	C5/CALCA/CHGA/FPR2/CXCL1/IL1B/CXCR1/CXCR2/LBP/PF4V1/PPBP/S100A7/S100A8/S100A12/SAA1/CCL24/CXCL5/UMOD/XG/SCG2	20
BP	GO:0097530	granulocyte migration	16/416	141/18670	1.05E-07	5.80478E-05	5.2316E-05	CXCL1/IL1B/CXCR1/CXCR2/LBP/PF4V1/PPBP/S100A7/S100A8/S100A12/SAA1/CCL24/CXCL5/UMOD/XG/SCG2	16
BP	GO:0009914	hormone transport	24/416	322/18670	2.71716E-07	0.000128755	0.000116041	ADCY5/AGT/CACNA1E/CHGA/FGA/FGB/FGG/GALR1/GCG/IL1B/KCNC2/MTNR1B/NEUROD1/PTPRN/SLC2A2/SOX11/ABCC8/TAC1/HNF1A/TNF/TTR/VGF/SYBU/RFX6	24
BP	GO:1990266	neutrophil migration	14/416	118/18670	3.79812E-07	0.00015748	0.00014193	CXCL1/IL1B/CXCR1/CXCR2/LBP/PF4V1/PPBP/S100A8/S100A12/SAA1/CCL24/CXCL5/UMOD/XG	14
BP	GO:0002526	acute inflammatory response	19/416	220/18670	5.31521E-07	0.000191475	0.000172569	APOA2/C5/C8A/C8B/CPN1/F2/IL1A/IL1B/CXCR2/LBP/S100A8/SAA1/SAA2/SAA4/TAC1/TNF/VTN/VNN1/CREB3L3	19
BP	GO:0046879	hormone secretion	23/416	312/18670	5.85588E-07	0.000191475	0.000172569	ADCY5/AGT/CACNA1E/CHGA/FGA/FGB/FGG/GALR1/GCG/IL1B/KCNC2/MTNR1B/NEUROD1/PTPRN/SLC2A2/SOX11/ABCC8/TAC1/HNF1A/TNF/VGF/SYBU/RFX6	23
BP	GO:0071621	granulocyte chemotaxis	14/416	123/18670	6.3498E-07	0.000191475	0.000172569	CXCL1/IL1B/CXCR1/CXCR2/LBP/PF4V1/PPBP/S100A7/S100A8/S100A12/SAA1/CCL24/CXCL5/SCG2	14
BP	GO:0060326	cell chemotaxis	22/416	304/18670	1.40318E-06	0.000387864	0.000349565	C5/CALCA/CHGA/DEFB4A/FPR2/CXCL1/HOXB9/IL1B/CXCR1/CXCR2/LBP/PF4V1/PPBP/S100A7/S100A8/S100A12/SAA1/SAA2/SAA4/CCL24/CXCL5/SCG2	22
BP	GO:0042742	defense response to bacterium	23/416	330/18670	1.54281E-06	0.000393655	0.000354785	KLK3/CHGA/DEFA3/DEFA5/DEFB4A/F2/FGA/FGB/FPR2/LBP/PGC/PLA2G2A/PPBP/S100A7/S100A8/S100A12/SEMG1/TNF/VGF/SPAG11B/BPIFA1/PGLYRP4/SPAG11A	23
BP	GO:0023061	signal release	28/416	462/18670	1.84938E-06	0.000438171	0.000394905	ADCY5/AGT/CACNA1E/CHGA/FGA/FGB/FGG/GALR1/GCG/IL1B/KCNC2/MTNR1B/NEUROD1/PTPRN/SLC2A2/SOX11/ABCC8/SYP/SYT4/TAC1/HNF1A/TNF/VGF/CPLX2/HRH3/SYBU/TRIM9/RFX6	28
BP	GO:0046883	regulation of hormone secretion	20/416	266/18670	2.36517E-06	0.000523017	0.000471373	ADCY5/AGT/CACNA1E/CHGA/FGA/FGB/FGG/GALR1/GCG/IL1B/KCNC2/MTNR1B/NEUROD1/SLC2A2/SOX11/ABCC8/TAC1/TNF/SYBU/RFX6	20
BP	GO:0030595	leukocyte chemotaxis	18/416	224/18670	2.97836E-06	0.000617451	0.000556483	C5/CALCA/CHGA/FPR2/CXCL1/IL1B/CXCR1/CXCR2/LBP/PF4V1/PPBP/S100A7/S100A8/S100A12/SAA1/CCL24/CXCL5/SCG2	18
BP	GO:0030593	neutrophil chemotaxis	12/416	104/18670	3.47892E-06	0.00066567	0.000599941	CXCL1/IL1B/CXCR1/CXCR2/LBP/PF4V1/PPBP/S100A8/S100A12/SAA1/CCL24/CXCL5	12
BP	GO:0030072	peptide hormone secretion	19/416	250/18670	3.61232E-06	0.00066567	0.000599941	ADCY5/CACNA1E/CHGA/FGA/FGB/FGG/GCG/IL1B/KCNC2/MTNR1B/NEUROD1/PTPRN/SLC2A2/ABCC8/HNF1A/TNF/VGF/SYBU/RFX6	19
BP	GO:0019731	antibacterial humoral response	8/416	46/18670	7.05933E-06	0.001232411	0.00111072	KLK3/DEFA3/DEFA5/FGA/FGB/PGC/SEMG1/BPIFA1	8
BP	GO:0006953	acute-phase response	8/416	47/18670	8.34343E-06	0.001383757	0.001247123	F2/IL1A/IL1B/LBP/SAA1/SAA2/SAA4/TNF	8
BP	GO:0030073	insulin secretion	16/416	207/18670	1.71326E-05	0.002706131	0.002438923	ADCY5/CACNA1E/CHGA/GCG/IL1B/KCNC2/MTNR1B/NEUROD1/PTPRN/SLC2A2/ABCC8/HNF1A/TNF/VGF/SYBU/RFX6	16
BP	GO:0090276	regulation of peptide hormone secretion	16/416	208/18670	1.81885E-05	0.002742335	0.002471552	ADCY5/CACNA1E/CHGA/FGA/FGB/FGG/GCG/IL1B/KCNC2/MTNR1B/NEUROD1/SLC2A2/ABCC8/TNF/SYBU/RFX6	16
BP	GO:0034116	positive regulation of heterotypic cell-cell adhesion	5/416	16/18670	1.91218E-05	0.002757689	0.00248539	FGA/FGB/FGG/IL1B/TNF	5
BP	GO:0031424	keratinization	16/416	224/18670	4.49824E-05	0.006216949	0.005603077	KRT13/KRT31/KRT33A/PI3/SPRR2A/SPRR2E/SPRR2F/KRT23/KLK13/KLK14/KLK12/KRT20/KRT40/RPTN/DSG4/KRTAP5-5	16
BP	GO:0031016	pancreas development	9/416	78/18670	5.81918E-05	0.007720883	0.006958509	INSM1/NEUROD1/NKX2-2/PAX4/HNF1A/MSLN/NEUROG3/RFX6/PTF1A	9
BP	GO:0031640	killing of cells of other organism	8/416	62/18670	6.7035E-05	0.008235378	0.007422202	CHGA/DEFA3/DEFA5/DEFB4A/F2/S100A12/SEMG1/PGLYRP4	8
BP	GO:0044364	disruption of cells of other organism	8/416	62/18670	6.7035E-05	0.008235378	0.007422202	CHGA/DEFA3/DEFA5/DEFB4A/F2/S100A12/SEMG1/PGLYRP4	8
BP	GO:0010466	negative regulation of peptidase activity	17/416	262/18670	8.70248E-05	0.010009039	0.009020729	AGT/AMBP/C5/SERPINA6/KNG1/PI3/SERPINB4/VIL1/VTN/SERPINA10/UMODL1/WFDC8/A2ML1/WFDC5/SERPINA11/C3P1/SPINT4	17
BP	GO:0015837	amine transport	10/416	102/18670	9.29711E-05	0.010009039	0.009020729	AGT/CHGA/DDC/NTSR1/RAB3B/SYT4/SLC38A3/HRH3/RHCG/SYT13	10
BP	GO:0032892	positive regulation of organic acid transport	6/416	34/18670	9.35424E-05	0.010009039	0.009020729	AGT/CYP4A11/IL1B/NTSR1/SYT4/SLC38A3	6
BP	GO:0048665	neuron fate specification	6/416	34/18670	9.35424E-05	0.010009039	0.009020729	ASCL1/ATOH1/EVX1/NKX2-2/FEV/DBX1	6
BP	GO:0032103	positive regulation of response to external stimulus	19/416	323/18670	0.000125189	0.012976605	0.011695272	AGT/DSCAM/F2/FPR2/IL1B/CXCR2/LBP/NPY/PGC/PLA2G2A/S100A7/S100A8/S100A12/CCL24/TAC1/TNF/SCG2/CREB3L3/TUBB2B	19
BP	GO:0002791	regulation of peptide secretion	25/416	500/18670	0.000155446	0.014782099	0.013322489	ADCY5/APOA2/C5/CACNA1E/CHGA/FGA/FGB/FGG/GCG/IL1A/IL1B/KCNC2/MTNR1B/NEUROD1/PAEP/S100A8/SAA1/SLC2A2/ABCC8/SYT4/TNF/CHIA/KRT20/SYBU/RFX6	25
BP	GO:0051480	regulation of cytosolic calcium ion concentration	20/416	357/18670	0.000161398	0.014782099	0.013322489	ADCY5/AGT/CALB1/CALCA/CALCB/F2/FPR2/GALR1/CXCR1/CXCR2/KNG1/MTNR1B/NTSR1/PTGFR/SAA1/TAC1/TRPC5/SCGN/CHRNA9/PROK2	20
BP	GO:0050708	regulation of protein secretion	24/416	472/18670	0.00016334	0.014782099	0.013322489	ADCY5/APOA2/C5/CACNA1E/CHGA/FGA/FGB/FGG/GCG/IL1A/IL1B/KCNC2/MTNR1B/NEUROD1/PAEP/SAA1/SLC2A2/ABCC8/SYT4/TNF/CHIA/KRT20/SYBU/RFX6	24
BP	GO:0010951	negative regulation of endopeptidase activity	16/416	250/18670	0.000163465	0.014782099	0.013322489	AGT/AMBP/C5/SERPINA6/KNG1/PI3/SERPINB4/VIL1/VTN/SERPINA10/WFDC8/A2ML1/WFDC5/SERPINA11/C3P1/SPINT4	16
BP	GO:0050796	regulation of insulin secretion	13/416	176/18670	0.000164889	0.014782099	0.013322489	ADCY5/CACNA1E/CHGA/GCG/IL1B/KCNC2/MTNR1B/NEUROD1/SLC2A2/ABCC8/TNF/SYBU/RFX6	13
BP	GO:0030216	keratinocyte differentiation	18/416	305/18670	0.000180101	0.015720919	0.014168609	KRT13/KRT31/KRT33A/PI3/S100A7/SPRR2A/SPRR2E/SPRR2F/KRT23/KLK13/KLK14/KLK12/WNT16/KRT20/KRT40/RPTN/DSG4/KRTAP5-5	18
BP	GO:0002065	columnar/cuboidal epithelial cell differentiation	10/416	112/18670	0.00020286	0.017253504	0.015549863	ASCL1/ATOH1/CDH2/CDX2/INSM1/NEUROD1/NKX2-2/NPY/SOX11/RFX6	10
BP	GO:0019835	cytolysis	6/416	40/18670	0.00023851	0.018925057	0.017056364	C5/C8A/C8B/F2/LBP/PGLYRP4	6
BP	GO:0034114	regulation of heterotypic cell-cell adhesion	5/416	26/18670	0.00023963	0.018925057	0.017056364	FGA/FGB/FGG/IL1B/TNF	5
BP	GO:0071377	cellular response to glucagon stimulus	5/416	26/18670	0.00023963	0.018925057	0.017056364	ADCY5/GCG/PCK1/GLP2R/FGF21	5
BP	GO:0060579	ventral spinal cord interneuron fate commitment	4/416	15/18670	0.000272888	0.020572019	0.018540702	ASCL1/EVX1/NKX2-2/DBX1	4
BP	GO:0060581	cell fate commitment involved in pattern specification	4/416	15/18670	0.000272888	0.020572019	0.018540702	ASCL1/EVX1/NKX2-2/DBX1	4
BP	GO:0007586	digestion	11/416	139/18670	0.000286608	0.020821566	0.018765609	APOA2/NEUROD1/PGC/SLC2A2/SST/TAC1/TFF2/TFF3/VIL1/CHIA/NPC1L1	11
BP	GO:0072378	blood coagulation, fibrin clot formation	5/416	27/18670	0.000288752	0.020821566	0.018765609	F2/FGA/FGB/FGG/KNG1	5
BP	GO:1990868	response to chemokine	9/416	97/18670	0.000314593	0.021739693	0.019593078	CXCL1/CXCR1/CXCR2/PF4V1/PPBP/REG1A/CCL24/CXCL5/TFF2	9
BP	GO:1990869	cellular response to chemokine	9/416	97/18670	0.000314593	0.021739693	0.019593078	CXCL1/CXCR1/CXCR2/PF4V1/PPBP/REG1A/CCL24/CXCL5/TFF2	9
BP	GO:0032890	regulation of organic acid transport	7/416	59/18670	0.000325806	0.022055101	0.019877343	AGT/CYP4A11/IL1B/NTSR1/SYT4/SLC38A3/HRH3	7
BP	GO:0034368	protein-lipid complex remodeling	5/416	28/18670	0.000345147	0.022448082	0.020231519	AGT/ALB/APOA2/APOC3/PLA2G2A	5
BP	GO:0034369	plasma lipoprotein particle remodeling	5/416	28/18670	0.000345147	0.022448082	0.020231519	AGT/ALB/APOA2/APOC3/PLA2G2A	5
BP	GO:0050900	leukocyte migration	24/416	499/18670	0.000369845	0.02359184	0.021262341	C5/CALCA/CHGA/F2/FPR2/CXCL1/IL1B/CXCR1/CXCR2/LBP/PF4V1/PPBP/RET/S100A7/S100A8/S100A12/SAA1/CCL24/CXCL5/TNF/UMOD/XG/SCG2/SLC7A9	24
BP	GO:0034367	protein-containing complex remodeling	5/416	29/18670	0.00040949	0.025627877	0.023097337	AGT/ALB/APOA2/APOC3/PLA2G2A	5
BP	GO:0055123	digestive system development	11/416	146/18670	0.000437096	0.026817459	0.024169457	ASCL1/CDX2/HOXD13/NKX2-2/NPY/REG1A/RET/SOX11/TNF/ALX4/PTF1A	11
BP	GO:0009913	epidermal cell differentiation	19/416	358/18670	0.00045881	0.026817459	0.024169457	ATOH1/KRT13/KRT31/KRT33A/PI3/S100A7/SPRR2A/SPRR2E/SPRR2F/KRT23/KLK13/KLK14/KLK12/WNT16/KRT20/KRT40/RPTN/DSG4/KRTAP5-5	19
BP	GO:0021514	ventral spinal cord interneuron differentiation	4/416	17/18670	0.000459286	0.026817459	0.024169457	ASCL1/EVX1/NKX2-2/DBX1	4
BP	GO:0031018	endocrine pancreas development	6/416	45/18670	0.000460837	0.026817459	0.024169457	INSM1/NEUROD1/NKX2-2/PAX4/NEUROG3/RFX6	6
BP	GO:0015849	organic acid transport	18/416	333/18670	0.000518901	0.028754657	0.025915372	AGT/AGXT/AKR1C4/CYP4A11/IL1B/NTSR1/SLC26A4/PLA2G2A/SYT4/SLC13A2/SLC38A3/SLC7A9/HRH3/PLA2G2F/SLC7A3/SLC38A8/SLC5A8/SLC16A12	18
BP	GO:0046942	carboxylic acid transport	18/416	333/18670	0.000518901	0.028754657	0.025915372	AGT/AGXT/AKR1C4/CYP4A11/IL1B/NTSR1/SLC26A4/PLA2G2A/SYT4/SLC13A2/SLC38A3/SLC7A9/HRH3/PLA2G2F/SLC7A3/SLC38A8/SLC5A8/SLC16A12	18
BP	GO:1904036	negative regulation of epithelial cell apoptotic process	6/416	46/18670	0.000520132	0.028754657	0.025915372	FGA/FGB/FGG/NEUROD1/SCG2/FGF21	6
BP	GO:0045861	negative regulation of proteolysis	19/416	363/18670	0.000543329	0.029086031	0.026214026	AGT/AMBP/C5/SERPINA6/F2/KNG1/PI3/SERPINB4/VIL1/VTN/SERPINA10/TM4SF20/UMODL1/WFDC8/A2ML1/WFDC5/SERPINA11/C3P1/SPINT4	19
BP	GO:0015711	organic anion transport	23/416	482/18670	0.000543664	0.029086031	0.026214026	AGT/AGXT/APOA2/APOC3/AKR1C4/CYP4A11/G6PC/IL1B/NTSR1/SLC26A4/PLA2G2A/RHAG/SLC2A2/SYT4/SLC13A2/SLC38A3/SLC7A9/HRH3/PLA2G2F/SLC7A3/SLC38A8/SLC5A8/SLC16A12	23
BP	GO:0051957	positive regulation of amino acid transport	4/416	18/18670	0.000580182	0.03054703	0.027530764	AGT/NTSR1/SYT4/SLC38A3	4
BP	GO:0048663	neuron fate commitment	7/416	65/18670	0.000593073	0.030737885	0.027702773	ASCL1/ATOH1/EVX1/NKX2-2/FEV/DBX1/PTF1A	7
BP	GO:0051047	positive regulation of secretion	21/416	428/18670	0.00065765	0.033560408	0.030246596	AGT/C5/CYP4A11/FGA/FGB/FGG/GALR1/GCG/IL1A/IL1B/NTSR1/PAEP/S100A8/SAA1/SOX11/SYT4/TAC1/TNF/CHIA/SYBU/RFX6	21
BP	GO:0051955	regulation of amino acid transport	5/416	33/18670	0.000760691	0.037299265	0.033616271	AGT/NTSR1/SYT4/SLC38A3/HRH3	5
BP	GO:2000352	negative regulation of endothelial cell apoptotic process	5/416	33/18670	0.000760691	0.037299265	0.033616271	FGA/FGB/FGG/SCG2/FGF21	5
BP	GO:0070098	chemokine-mediated signaling pathway	8/416	88/18670	0.000771123	0.037299265	0.033616271	CXCL1/CXCR1/CXCR2/PF4V1/PPBP/CCL24/CXCL5/TFF2	8
BP	GO:0008544	epidermis development	22/416	464/18670	0.000775897	0.037299265	0.033616271	ATOH1/KRT13/KRT31/KRT33A/PI3/S100A7/SPRR2A/SPRR2E/SPRR2F/TNF/HOXB13/KRT23/KLK13/KLK14/KLK12/WNT16/KRT20/ALX4/KRT40/RPTN/DSG4/KRTAP5-5	22
BP	GO:1903793	positive regulation of anion transport	6/416	50/18670	0.000818797	0.038343602	0.034557489	AGT/CYP4A11/IL1B/NTSR1/SYT4/SLC38A3	6
BP	GO:0051346	negative regulation of hydrolase activity	22/416	466/18670	0.00082074	0.038343602	0.034557489	AGT/AMBP/APOA2/APOC3/C5/SERPINA6/GNAT1/KNG1/PI3/SERPINB4/TNF/VIL1/VTN/RIMBP2/SERPINA10/UMODL1/WFDC8/A2ML1/WFDC5/SERPINA11/C3P1/SPINT4	22
BP	GO:0048565	digestive tract development	10/416	134/18670	0.000848603	0.039094653	0.03523438	ASCL1/CDX2/HOXD13/NKX2-2/NPY/REG1A/RET/SOX11/TNF/ALX4	10
BP	GO:0007620	copulation	4/416	20/18670	0.000886801	0.040294784	0.036316008	PI3/SEMG1/TAC1/KLK14	4
BP	GO:0051954	positive regulation of amine transport	5/416	35/18670	0.001003203	0.044967914	0.040527704	AGT/NTSR1/RAB3B/SYT4/SLC38A3	5
BP	GO:0009713	catechol-containing compound biosynthetic process	4/416	21/18670	0.001076342	0.046366575	0.041788259	DDC/INSM1/PAH/HAND2	4
BP	GO:0042423	catecholamine biosynthetic process	4/416	21/18670	0.001076342	0.046366575	0.041788259	DDC/INSM1/PAH/HAND2	4
BP	GO:0048485	sympathetic nervous system development	4/416	21/18670	0.001076342	0.046366575	0.041788259	ASCL1/INSM1/SOX11/HAND2	4
BP	GO:0030195	negative regulation of blood coagulation	6/416	53/18670	0.001118479	0.047564022	0.042867468	F2/FGA/FGB/FGG/KNG1/VTN	6
BP	GO:0033762	response to glucagon	5/416	36/18670	0.001143966	0.048032093	0.043289321	ADCY5/GCG/PCK1/GLP2R/FGF21	5
BP	GO:0001660	fever generation	3/416	10/18670	0.001172895	0.048631165	0.04382924	IL1A/IL1B/TNF	3
BP	GO:0043588	skin development	20/416	419/18670	0.001224704	0.049958467	0.045025481	KRT13/KRT31/KRT33A/PI3/S100A7/SPRR2A/SPRR2E/SPRR2F/TNF/KRT23/KLK13/KLK14/KLK12/WNT16/KRT20/ALX4/KRT40/RPTN/DSG4/KRTAP5-5	20
BP	GO:1900047	negative regulation of hemostasis	6/416	54/18670	0.00123503	0.049958467	0.045025481	F2/FGA/FGB/FGG/KNG1/VTN	6
BP	GO:0051952	regulation of amine transport	8/416	95/18670	0.001274546	0.050935755	0.045906271	AGT/CHGA/NTSR1/RAB3B/SYT4/SLC38A3/HRH3/SYT13	8
BP	GO:0021513	spinal cord dorsal/ventral patterning	4/416	22/18670	0.001292588	0.051041825	0.046001867	ASCL1/EVX1/NKX2-2/DBX1	4
BP	GO:0044706	multi-multicellular organism process	13/416	222/18670	0.001484366	0.05792519	0.052205557	AGT/AMBP/CALCA/PRLHR/IL1B/PSG2/PSG3/PSG4/PTGFR/SEMG1/TAC1/SLC38A3/KLK14	13
BP	GO:0050995	negative regulation of lipid catabolic process	4/416	23/18670	0.001537445	0.059298913	0.053443636	APOA2/APOC3/IL1B/TNF	4
BP	GO:0050819	negative regulation of coagulation	6/416	57/18670	0.001640892	0.062292483	0.056141615	F2/FGA/FGB/FGG/KNG1/VTN	6
BP	GO:1903532	positive regulation of secretion by cell	19/416	399/18670	0.001652619	0.062292483	0.056141615	AGT/C5/FGA/FGB/FGG/GALR1/GCG/IL1A/IL1B/NTSR1/PAEP/SAA1/SOX11/SYT4/TAC1/TNF/CHIA/SYBU/RFX6	19
BP	GO:0072503	cellular divalent inorganic cation homeostasis	22/416	493/18670	0.001684174	0.06276861	0.056570729	ADCY5/AGT/CALB1/CALCA/CALCB/F2/FPR2/GALR1/CXCR1/CXCR2/KNG1/MTNR1B/NTSR1/PTGFR/S100A8/SAA1/TAC1/TRPC5/SCGN/CHRNA9/PROK2/SLC39A5	22
BP	GO:0022600	digestive system process	8/416	100/18670	0.00177265	0.065296663	0.058849158	APOA2/NEUROD1/SLC2A2/TAC1/TFF2/TFF3/VIL1/NPC1L1	8
BP	GO:0021511	spinal cord patterning	4/416	24/18670	0.00181281	0.065296663	0.058849158	ASCL1/EVX1/NKX2-2/DBX1	4
BP	GO:0046717	acid secretion	9/416	124/18670	0.001847967	0.065296663	0.058849158	AGXT/CYP4A11/IL1B/NTSR1/PLA2G2A/SYT4/TFF2/HRH3/PLA2G2F	9
BP	GO:0050832	defense response to fungus	5/416	40/18670	0.001856482	0.065296663	0.058849158	CHGA/DEFA3/DEFA5/S100A8/S100A12	5
BP	GO:0021700	developmental maturation	15/416	284/18670	0.00185721	0.065296663	0.058849158	ASCL1/EPHA8/FGG/NEFL/PAEP/PTPRN/RET/SEMG1/SIX3/SYP/SYT4/HOXB13/FEV/SYBU/SRRM4	15
BP	GO:0050830	defense response to Gram-positive bacterium	8/416	101/18670	0.001888558	0.065296663	0.058849158	CHGA/DEFA3/DEFA5/DEFB4A/LBP/PLA2G2A/TNF/PGLYRP4	8
BP	GO:0007187	G protein-coupled receptor signaling pathway, coupled to cyclic nucleotide second messenger	14/416	256/18670	0.001889804	0.065296663	0.058849158	ADCY5/AGT/CALCA/CALCB/CHGA/FPR2/GALR1/GCG/GNAT1/MTNR1B/NPY/PTGFR/GLP2R/HRH3	14
BP	GO:2000351	regulation of endothelial cell apoptotic process	6/416	59/18670	0.001962944	0.067124589	0.060496591	FGA/FGB/FGG/TNF/SCG2/FGF21	6
BP	GO:0000353	formation of quadruple SL/U4/U5/U6 snRNP	3/416	12/18670	0.002080115	0.067644526	0.060965189	RNU5B-1/RNU4-2/RNU4-1	3
BP	GO:0000365	mRNA trans splicing, via spliceosome	3/416	12/18670	0.002080115	0.067644526	0.060965189	RNU5B-1/RNU4-2/RNU4-1	3
BP	GO:0007320	insemination	3/416	12/18670	0.002080115	0.067644526	0.060965189	SEMG1/TAC1/KLK14	3
BP	GO:0016554	cytidine to uridine editing	3/416	12/18670	0.002080115	0.067644526	0.060965189	APOBEC1/APOBEC2/A1CF	3
BP	GO:0045291	mRNA trans splicing, SL addition	3/416	12/18670	0.002080115	0.067644526	0.060965189	RNU5B-1/RNU4-2/RNU4-1	3
BP	GO:0055074	calcium ion homeostasis	21/416	471/18670	0.002150183	0.069244258	0.062406961	ADCY5/AGT/CALB1/CALCA/CALCB/F2/FPR2/GALR1/CXCR1/CXCR2/KNG1/MTNR1B/NTSR1/PTGFR/REG1A/SAA1/TAC1/TRPC5/SCGN/CHRNA9/PROK2	21
BP	GO:0007204	positive regulation of cytosolic calcium ion concentration	16/416	319/18670	0.002244539	0.07158785	0.064519142	ADCY5/AGT/CALCA/F2/FPR2/GALR1/CXCR1/CXCR2/KNG1/NTSR1/PTGFR/SAA1/TAC1/TRPC5/CHRNA9/PROK2	16
BP	GO:2001237	negative regulation of extrinsic apoptotic signaling pathway	8/416	104/18670	0.002272481	0.071788768	0.064700221	FGA/FGB/FGG/IL1A/IL1B/TNF/SCG2/FAIM2	8
BP	GO:0050729	positive regulation of inflammatory response	10/416	153/18670	0.002302456	0.0720495	0.064935208	AGT/IL1B/LBP/PLA2G2A/S100A8/S100A12/CCL24/TAC1/TNF/CREB3L3	10
BP	GO:2001236	regulation of extrinsic apoptotic signaling pathway	10/416	155/18670	0.002531447	0.07847486	0.070726116	AGT/FGA/FGB/FGG/IL1A/IL1B/RET/TNF/SCG2/FAIM2	10
BP	GO:0034374	low-density lipoprotein particle remodeling	3/416	13/18670	0.002659723	0.081687962	0.073621951	AGT/APOA2/PLA2G2A	3
BP	GO:0046887	positive regulation of hormone secretion	9/416	131/18670	0.002688711	0.081820697	0.07374158	FGA/FGB/FGG/GALR1/GCG/SOX11/TAC1/SYBU/RFX6	9
BP	GO:0035883	enteroendocrine cell differentiation	4/416	27/18670	0.002840598	0.08550979	0.077066405	INSM1/NEUROD1/NKX2-2/RFX6	4
BP	GO:0016485	protein processing	16/416	328/18670	0.002956391	0.08550979	0.077066405	KLK3/C5/C8A/C8B/CGB3/CPN1/F2/FGA/FGB/FGG/IL1B/KLK1/PCSK1/PCSK2/VTN/KLK13	16
BP	GO:0052547	regulation of peptidase activity	20/416	452/18670	0.002960969	0.08550979	0.077066405	AGT/AMBP/C5/SERPINA6/KNG1/PI3/S100A8/SERPINB4/SEMG1/TNF/VIL1/VTN/SERPINA10/UMODL1/WFDC8/A2ML1/WFDC5/SERPINA11/C3P1/SPINT4	20
BP	GO:0071333	cellular response to glucose stimulus	9/416	133/18670	0.002977477	0.08550979	0.077066405	ADCY5/GCG/NEUROD1/PCK1/PTPRN/GJB6/FGF21/SYBU/RFX6	9
BP	GO:0002673	regulation of acute inflammatory response	10/416	159/18670	0.003044128	0.08550979	0.077066405	C5/C8A/C8B/CPN1/F2/IL1B/TAC1/TNF/VTN/CREB3L3	10
BP	GO:0042593	glucose homeostasis	13/416	241/18670	0.003047108	0.08550979	0.077066405	ADCY5/G6PC/GCG/MTNR1B/NEUROD1/PCK1/PTPRN/HNF1A/VGF/GJB6/FGF21/SYBU/RFX6	13
BP	GO:0003333	amino acid transmembrane transport	7/416	86/18670	0.003074047	0.08550979	0.077066405	AGT/NTSR1/SLC38A3/SLC7A9/SLC7A3/SLC38A8/SLC16A12	7
BP	GO:0002920	regulation of humoral immune response	9/416	134/18670	0.003130756	0.08550979	0.077066405	C5/C8A/C8B/CPN1/F2/IL1B/PGC/TNF/VTN	9
BP	GO:0032496	response to lipopolysaccharide	16/416	330/18670	0.003137631	0.08550979	0.077066405	CSF3/DEFA3/DEFA5/CXCL1/IL1B/LBP/PCK1/PF4V1/PPBP/PTGFR/S100A7/S100A8/CXCL5/TAC1/TNF/GJB6	16
BP	GO:0032309	icosanoid secretion	5/416	45/18670	0.003147904	0.08550979	0.077066405	CYP4A11/IL1B/NTSR1/PLA2G2A/PLA2G2F	5
BP	GO:0048483	autonomic nervous system development	5/416	45/18670	0.003147904	0.08550979	0.077066405	ASCL1/INSM1/RET/SOX11/HAND2	5
BP	GO:0071827	plasma lipoprotein particle organization	5/416	45/18670	0.003147904	0.08550979	0.077066405	AGT/ALB/APOA2/APOC3/PLA2G2A	5
BP	GO:0033500	carbohydrate homeostasis	13/416	242/18670	0.003156901	0.08550979	0.077066405	ADCY5/G6PC/GCG/MTNR1B/NEUROD1/PCK1/PTPRN/HNF1A/VGF/GJB6/FGF21/SYBU/RFX6	13
BP	GO:0015893	drug transport	12/416	214/18670	0.003177078	0.08550979	0.077066405	AGT/GALR1/NTSR1/RAB3B/RHAG/SYT4/TCN1/SLC38A3/SYT13/SLC7A3/SLC5A8/SLC16A12	12
BP	GO:0072577	endothelial cell apoptotic process	6/416	65/18670	0.00321873	0.08550979	0.077066405	FGA/FGB/FGG/TNF/SCG2/FGF21	6
BP	GO:0098739	import across plasma membrane	8/416	110/18670	0.003222407	0.08550979	0.077066405	AGT/CNGA3/KCNJ3/NTSR1/KCNK9/SLC7A3/SLC39A5/KCNJ18	8
BP	GO:0042730	fibrinolysis	4/416	28/18670	0.003256506	0.085728818	0.077263806	F2/FGA/FGB/FGG	4
BP	GO:0071331	cellular response to hexose stimulus	9/416	135/18670	0.003290188	0.08593348	0.07744826	ADCY5/GCG/NEUROD1/PCK1/PTPRN/GJB6/FGF21/SYBU/RFX6	9
BP	GO:0052548	regulation of endopeptidase activity	19/416	425/18670	0.003333679	0.086389174	0.077858958	AGT/AMBP/C5/SERPINA6/KNG1/PI3/S100A8/SERPINB4/SEMG1/TNF/VIL1/VTN/SERPINA10/WFDC8/A2ML1/WFDC5/SERPINA11/C3P1/SPINT4	19
BP	GO:1904019	epithelial cell apoptotic process	8/416	111/18670	0.00340691	0.086572557	0.078024233	FGA/FGB/FGG/NEUROD1/SIX3/TNF/SCG2/FGF21	8
BP	GO:0006874	cellular calcium ion homeostasis	20/416	458/18670	0.003433963	0.086572557	0.078024233	ADCY5/AGT/CALB1/CALCA/CALCB/F2/FPR2/GALR1/CXCR1/CXCR2/KNG1/MTNR1B/NTSR1/PTGFR/SAA1/TAC1/TRPC5/SCGN/CHRNA9/PROK2	20
BP	GO:0071326	cellular response to monosaccharide stimulus	9/416	136/18670	0.003455941	0.086572557	0.078024233	ADCY5/GCG/NEUROD1/PCK1/PTPRN/GJB6/FGF21/SYBU/RFX6	9
BP	GO:0002067	glandular epithelial cell differentiation	5/416	46/18670	0.003468364	0.086572557	0.078024233	ASCL1/INSM1/NEUROD1/NKX2-2/RFX6	5
BP	GO:0050829	defense response to Gram-negative bacterium	7/416	88/18670	0.003497354	0.086572557	0.078024233	CHGA/DEFA3/DEFA5/DEFB4A/F2/LBP/S100A7	7
BP	GO:1904035	regulation of epithelial cell apoptotic process	7/416	88/18670	0.003497354	0.086572557	0.078024233	FGA/FGB/FGG/NEUROD1/TNF/SCG2/FGF21	7
BP	GO:0050918	positive chemotaxis	6/416	68/18670	0.004034358	0.098397498	0.088681559	DEFB4A/FPR2/SAA1/SAA2/SAA4/SCG2	6
BP	GO:0015802	basic amino acid transport	3/416	15/18670	0.004093716	0.098397498	0.088681559	AGT/SLC38A3/SLC7A3	3
BP	GO:0072148	epithelial cell fate commitment	3/416	15/18670	0.004093716	0.098397498	0.088681559	ATOH1/NEUROD1/NKX2-2	3
BP	GO:0090197	positive regulation of chemokine secretion	3/416	15/18670	0.004093716	0.098397498	0.088681559	C5/TNF/CHIA	3
CC	GO:0060205	cytoplasmic vesicle lumen	22/441	338/19717	8.42124E-06	0.001380755	0.001230537	ALB/DEFA3/DEFA5/FGA/FGB/FGG/GCG/CXCL1/KNG1/PCSK1/PPBP/S100A7/S100A8/S100A12/SAA1/TCN1/TF/TTR/OLFM4/QPCT/SCG3/SCGB3A2	22
CC	GO:0031983	vesicle lumen	22/441	339/19717	8.82272E-06	0.001380755	0.001230537	ALB/DEFA3/DEFA5/FGA/FGB/FGG/GCG/CXCL1/KNG1/PCSK1/PPBP/S100A7/S100A8/S100A12/SAA1/TCN1/TF/TTR/OLFM4/QPCT/SCG3/SCGB3A2	22
CC	GO:0034364	high-density lipoprotein particle	6/441	26/19717	1.90524E-05	0.001987805	0.001771543	APOF/APOA2/APOC3/SAA1/SAA2/SAA4	6
CC	GO:0034774	secretory granule lumen	20/441	321/19717	4.01162E-05	0.003139093	0.002797577	ALB/DEFA3/DEFA5/FGA/FGB/FGG/GCG/CXCL1/KNG1/PCSK1/PPBP/S100A7/S100A8/S100A12/TCN1/TF/TTR/OLFM4/QPCT/SCG3	20
CC	GO:0072562	blood microparticle	12/441	147/19717	0.000118954	0.006986373	0.006226295	AGT/ALB/AMBP/APOA2/C8A/F2/FGA/FGB/FGG/KNG1/TF/VTN	12
CC	GO:0034358	plasma lipoprotein particle	6/441	37/19717	0.000156245	0.006986373	0.006226295	APOF/APOA2/APOC3/SAA1/SAA2/SAA4	6
CC	GO:1990777	lipoprotein particle	6/441	37/19717	0.000156245	0.006986373	0.006226295	APOF/APOA2/APOC3/SAA1/SAA2/SAA4	6
CC	GO:0032994	protein-lipid complex	6/441	39/19717	0.000211156	0.007762481	0.006917967	APOF/APOA2/APOC3/SAA1/SAA2/SAA4	6
CC	GO:0005788	endoplasmic reticulum lumen	18/441	309/19717	0.000223202	0.007762481	0.006917967	AFP/ALB/APOA2/CDH2/CHGB/F2/FGA/FGG/GCG/KNG1/TF/VGF/VTN/SCG2/MSLN/SCG3/SERPINA10/BPIFB2	18
CC	GO:0001533	cornified envelope	6/441	65/19717	0.003283017	0.093338144	0.083183482	PI3/SPRR2A/SPRR2E/SPRR2F/RPTN/DSG4	6
CC	GO:0030133	transport vesicle	18/441	392/19717	0.003343198	0.093338144	0.083183482	CHGA/DDC/DEFA5/GABRA2/PCSK1/PCSK2/PTPRN/RAB3B/SYP/SYT4/VGF/SCGN/SCG3/KCNK9/SVOP/SYT13/TRIM9/RAB3C	18
CC	GO:0031093	platelet alpha granule lumen	6/441	67/19717	0.003821435	0.093338144	0.083183482	ALB/FGA/FGB/FGG/KNG1/PPBP	6
CC	GO:0098563	intrinsic component of synaptic vesicle membrane	5/441	47/19717	0.003876664	0.093338144	0.083183482	GABRA2/RAB3B/SYP/SYT4/RAB3C	5
MF	GO:0048018	receptor ligand activity	32/367	482/17697	7.39626E-09	3.69813E-06	3.231E-06	AGT/C5/CALCA/CALCB/CGB3/CHGB/CSF3/DEFB4A/F2/GCG/GNRH2/CXCL1/IL1A/IL1B/NPY/PF4V1/PPBP/REG1A/SAA1/SAA2/SAA4/CCL24/CXCL5/SST/TNF/TTR/VGF/SCG2/MIA/FGF21/IL17C/INHBE	32
MF	GO:0030414	peptidase inhibitor activity	16/367	182/17697	1.30474E-06	0.000326184	0.000284982	AGT/AMBP/C5/SERPINA6/KNG1/PI3/SERPINB4/VIL1/SERPINA10/UMODL1/WFDC8/A2ML1/WFDC5/SERPINA11/C3P1/SPINT4	16
MF	GO:0004866	endopeptidase inhibitor activity	15/367	175/17697	3.83097E-06	0.000486693	0.000425216	AGT/AMBP/C5/SERPINA6/KNG1/PI3/SERPINB4/VIL1/SERPINA10/WFDC8/A2ML1/WFDC5/SERPINA11/C3P1/SPINT4	15
MF	GO:0004867	serine-type endopeptidase inhibitor activity	11/367	94/17697	3.89354E-06	0.000486693	0.000425216	AGT/AMBP/SERPINA6/PI3/SERPINB4/SERPINA10/WFDC8/A2ML1/WFDC5/SERPINA11/SPINT4	11
MF	GO:0061135	endopeptidase regulator activity	15/367	182/17697	6.20134E-06	0.000620134	0.000541801	AGT/AMBP/C5/SERPINA6/KNG1/PI3/SERPINB4/VIL1/SERPINA10/WFDC8/A2ML1/WFDC5/SERPINA11/C3P1/SPINT4	15
MF	GO:0005179	hormone activity	12/367	122/17697	8.85468E-06	0.00073789	0.000644683	AGT/CALCA/CALCB/CGB3/CHGB/GCG/GNRH2/NPY/SST/TTR/VGF/INHBE	12
MF	GO:0061134	peptidase regulator activity	16/367	219/17697	1.41592E-05	0.001011372	0.00088362	AGT/AMBP/C5/SERPINA6/KNG1/PI3/SERPINB4/VIL1/SERPINA10/UMODL1/WFDC8/A2ML1/WFDC5/SERPINA11/C3P1/SPINT4	16
MF	GO:0001664	G protein-coupled receptor binding	18/367	280/17697	2.37822E-05	0.001486387	0.001298633	AGT/C5/CALCA/CALCB/DEFB4A/GCG/GNAT1/CXCL1/NPY/PF4V1/PPBP/SAA1/CCL24/CXCL5/TAC1/TFF2/WNT16/PROK2	18
MF	GO:0042379	chemokine receptor binding	8/367	66/17697	6.37711E-05	0.003542836	0.00309532	C5/DEFB4A/CXCL1/PF4V1/PPBP/CCL24/CXCL5/TFF2	8
MF	GO:0004252	serine-type endopeptidase activity	12/367	160/17697	0.00013001	0.006500497	0.005679381	KLK3/F2/KLK1/PCSK1/PCSK2/KLK11/KLK13/KLK14/KLK12/PRSS29P/PRSS48/PRSS56	12
MF	GO:0005267	potassium channel activity	10/367	123/17697	0.00024468	0.011121796	0.009716938	KCNC2/KCNF1/KCNJ3/ABCC8/KCNK9/KCNK10/KCNH6/KCNU1/LRRC55/KCNJ18	10
MF	GO:0004857	enzyme inhibitor activity	19/367	375/17697	0.000332676	0.013661665	0.011935981	AGT/AMBP/APOA2/APOC3/C5/SERPINA6/KNG1/PI3/SERPINB4/VIL1/SERPINA10/UGT1A8/UMODL1/WFDC8/A2ML1/WFDC5/SERPINA11/C3P1/SPINT4	19
MF	GO:0001228	DNA-binding transcription activator activity, RNA polymerase II-specific	21/367	439/17697	0.000355203	0.013661665	0.011935981	ATOH1/HOXC11/HOXD13/LMX1A/MYCN/MYT1/NEUROD1/SIX6/SIX3/SOX11/HNF1A/HAND2/RAX/NEUROG3/ALX4/CREB3L3/CTCFL/RFX6/PTF1A/TBX10/ONECUT3	21
MF	GO:0008236	serine-type peptidase activity	12/367	182/17697	0.000428408	0.014835169	0.012961253	KLK3/F2/KLK1/PCSK1/PCSK2/KLK11/KLK13/KLK14/KLK12/PRSS29P/PRSS48/PRSS56	12
MF	GO:0005249	voltage-gated potassium channel activity	8/367	87/17697	0.000445055	0.014835169	0.012961253	KCNC2/KCNF1/KCNJ3/KCNK9/KCNH6/KCNU1/LRRC55/KCNJ18	8
MF	GO:0008009	chemokine activity	6/367	49/17697	0.00050304	0.015256101	0.013329015	C5/CXCL1/PF4V1/PPBP/CCL24/CXCL5	6
MF	GO:0017171	serine hydrolase activity	12/367	186/17697	0.000520838	0.015256101	0.013329015	KLK3/F2/KLK1/PCSK1/PCSK2/KLK11/KLK13/KLK14/KLK12/PRSS29P/PRSS48/PRSS56	12
MF	GO:0015020	glucuronosyltransferase activity	5/367	33/17697	0.00054922	0.015256101	0.013329015	UGT2B4/UGT2B11/UGT1A8/UGT3A1/UGT3A2	5
MF	GO:0005125	cytokine activity	13/367	220/17697	0.000709691	0.018676086	0.016317001	C5/CSF3/CXCL1/IL1A/IL1B/PF4V1/PPBP/CCL24/CXCL5/TNF/SCG2/IL17C/INHBE	13
MF	GO:0005496	steroid binding	8/367	95/17697	0.000802368	0.020059194	0.017525401	APOF/APOA2/APOC3/CALB1/SERPINA6/SYP/UGT1A8/PAQR9	8
MF	GO:0042056	chemoattractant activity	5/367	38/17697	0.001067155	0.025408441	0.022198953	DEFB4A/SAA1/SAA2/SAA4/SCG2	5
MF	GO:0050786	RAGE receptor binding	3/367	11/17697	0.001289636	0.029309903	0.0256076	S100A7/S100A8/S100A12	3
MF	GO:0019865	immunoglobulin binding	4/367	24/17697	0.001391963	0.030231387	0.026412686	AMBP/FCAR/FCGR3B/UMOD	4
MF	GO:0022803	passive transmembrane transporter activity	20/367	457/17697	0.001451107	0.030231387	0.026412686	CACNA1E/CLCA1/CNGA3/GABRA1/GABRA2/KCNC2/KCNF1/KCNJ3/RHAG/SCN3A/ABCC8/TRPC5/KCNK9/KCNK10/CHRNA9/KCNH6/KCNU1/SLC5A8/LRRC55/KCNJ18	20
MF	GO:0004175	endopeptidase activity	19/367	427/17697	0.001566903	0.031338067	0.027379574	KLK3/CLC/F2/ADAM2/KLK1/PCSK1/PCSK2/PGC/ECEL1/KLK11/KLK13/KLK14/KLK12/MMP26/PRSS29P/PRSS48/USP41/DDI1/PRSS56	19
MF	GO:0022839	ion gated channel activity	16/367	334/17697	0.001722761	0.033130012	0.028945168	CACNA1E/CLCA1/CNGA3/GABRA1/GABRA2/KCNC2/KCNF1/KCNJ3/SCN3A/KCNK9/KCNK10/CHRNA9/KCNH6/KCNU1/LRRC55/KCNJ18	16
MF	GO:0015079	potassium ion transmembrane transporter activity	10/367	159/17697	0.001806828	0.033459769	0.029233272	KCNC2/KCNF1/KCNJ3/ABCC8/KCNK9/KCNK10/KCNH6/KCNU1/LRRC55/KCNJ18	10
MF	GO:0017075	syntaxin-1 binding	4/367	26/17697	0.001895505	0.0338483	0.029572726	SYP/SYT4/CPLX2/SYBU	4
MF	GO:0008083	growth factor activity	10/367	163/17697	0.002170149	0.037416359	0.032690082	AGT/CSF3/F2/CXCL1/PPBP/REG1A/VGF/MIA/FGF21/INHBE	10
MF	GO:0022836	gated channel activity	16/367	343/17697	0.002251821	0.037530346	0.032789671	CACNA1E/CLCA1/CNGA3/GABRA1/GABRA2/KCNC2/KCNF1/KCNJ3/SCN3A/KCNK9/KCNK10/CHRNA9/KCNH6/KCNU1/LRRC55/KCNJ18	16
MF	GO:0005216	ion channel activity	18/367	416/17697	0.002784875	0.040918691	0.035750014	CACNA1E/CLCA1/CNGA3/GABRA1/GABRA2/KCNC2/KCNF1/KCNJ3/SCN3A/ABCC8/TRPC5/KCNK9/KCNK10/CHRNA9/KCNH6/KCNU1/LRRC55/KCNJ18	18
MF	GO:0005244	voltage-gated ion channel activity	11/367	197/17697	0.002785228	0.040918691	0.035750014	CACNA1E/KCNC2/KCNF1/KCNJ3/SCN3A/KCNK9/KCNK10/KCNH6/KCNU1/LRRC55/KCNJ18	11
MF	GO:0022832	voltage-gated channel activity	11/367	197/17697	0.002785228	0.040918691	0.035750014	CACNA1E/KCNC2/KCNF1/KCNJ3/SCN3A/KCNK9/KCNK10/KCNH6/KCNU1/LRRC55/KCNJ18	11
MF	GO:0005261	cation channel activity	15/367	319/17697	0.002832244	0.040918691	0.035750014	CACNA1E/CNGA3/KCNC2/KCNF1/KCNJ3/SCN3A/ABCC8/TRPC5/KCNK9/KCNK10/CHRNA9/KCNH6/KCNU1/LRRC55/KCNJ18	15
MF	GO:0022843	voltage-gated cation channel activity	9/367	142/17697	0.002864308	0.040918691	0.035750014	CACNA1E/KCNC2/KCNF1/KCNJ3/KCNK9/KCNH6/KCNU1/LRRC55/KCNJ18	9
MF	GO:0015267	channel activity	19/367	456/17697	0.003258656	0.045259113	0.039542172	CACNA1E/CLCA1/CNGA3/GABRA1/GABRA2/KCNC2/KCNF1/KCNJ3/RHAG/SCN3A/ABCC8/TRPC5/KCNK9/KCNK10/CHRNA9/KCNH6/KCNU1/LRRC55/KCNJ18	19
MF	GO:0031490	chromatin DNA binding	8/367	119/17697	0.003376327	0.045626043	0.039862753	ATOH1/H1-5/H1-1/INSM1/H3C7/PRDM7/NEUROG3/PRDM9	8
MF	GO:0022838	substrate-specific channel activity	18/367	428/17697	0.003754159	0.049396826	0.043157227	CACNA1E/CLCA1/CNGA3/GABRA1/GABRA2/KCNC2/KCNF1/KCNJ3/SCN3A/ABCC8/TRPC5/KCNK9/KCNK10/CHRNA9/KCNH6/KCNU1/LRRC55/KCNJ18	18
MF	GO:0005342	organic acid transmembrane transporter activity	9/367	153/17697	0.004691104	0.057694147	0.050406465	AKR1C4/SLC26A4/SLC13A2/SLC38A3/SLC7A9/SLC7A3/SLC38A8/SLC5A8/SLC16A12	9
MF	GO:0046943	carboxylic acid transmembrane transporter activity	9/367	153/17697	0.004691104	0.057694147	0.050406465	AKR1C4/SLC26A4/SLC13A2/SLC38A3/SLC7A9/SLC7A3/SLC38A8/SLC5A8/SLC16A12	9
MF	GO:0046873	metal ion transmembrane transporter activity	18/367	438/17697	0.00476172	0.057694147	0.050406465	CACNA1E/KCNC2/KCNF1/KCNJ3/SCN3A/ABCC8/TF/TRPC5/SLC13A2/KCNK9/KCNK10/CHRNA9/KCNH6/KCNU1/SLC5A8/LRRC55/SLC39A5/KCNJ18	18
MF	GO:0031489	myosin V binding	3/367	17/17697	0.004846308	0.057694147	0.050406465	RAB3B/NPC1L1/RAB3C	3
MF	GO:0030276	clathrin binding	5/367	57/17697	0.006464051	0.074418332	0.065018122	SYT4/TRPC5/CALY/NSG2/SYT13	5
MF	GO:0022840	leak channel activity	3/367	19/17697	0.00669765	0.074418332	0.065018122	RHAG/KCNK9/KCNK10	3
MF	GO:0022842	narrow pore channel activity	3/367	19/17697	0.00669765	0.074418332	0.065018122	RHAG/KCNK9/KCNK10	3
MF	GO:0005126	cytokine receptor binding	13/367	286/17697	0.006947527	0.075516594	0.065977656	C5/CSF3/DEFB4A/CXCL1/IL1A/IL1B/PF4V1/PPBP/CCL24/CXCL5/TFF2/TNF/INHBE	13
KEGG	hsa05150	Staphylococcus aureus infection	14/167	96/8076	8.32883E-09	1.9073E-06	1.69207E-06	C5/DEFA3/DEFA5/DEFB4A/FCAR/FCGR3B/FGG/FPR2/KRT13/KRT31/KRT33A/KRT23/KRT20/KRT40	14
KEGG	hsa04080	Neuroactive ligand-receptor interaction	23/167	341/8076	4.70893E-07	5.14104E-05	4.56088E-05	AGT/C5/CALCA/CALCB/F2/FPR2/GABRA1/GABRA2/GALR1/GCG/GNRH2/PRLHR/KNG1/MTNR1B/NPY/NTSR1/PTGFR/SST/TAC1/GLP2R/HRH3/CHRNA9/TAAR1	23
KEGG	hsa04950	Maturity onset diabetes of the young	7/167	26/8076	6.73498E-07	5.14104E-05	4.56088E-05	NEUROD1/NKX2-2/PAX4/SLC2A2/HNF1A/NEUROG3/RFX6	7
KEGG	hsa04657	IL-17 signaling pathway	10/167	94/8076	2.21103E-05	0.001265813	0.001122969	CSF3/DEFB4A/CXCL1/IL1B/S100A7/S100A8/CXCL5/TNF/IL17C/S100A7A	10
KEGG	hsa04610	Complement and coagulation cascades	9/167	85/8076	5.96813E-05	0.002733405	0.002424946	C5/C8A/C8B/F2/FGA/FGB/FGG/KNG1/VTN	9
KEGG	hsa04061	Viral protein interaction with cytokine and cytokine receptor	8/167	100/8076	0.001046475	0.039940466	0.035433279	CXCL1/CXCR1/CXCR2/PF4V1/PPBP/CCL24/CXCL5/TNF	8
KEGG	hsa04915	Estrogen signaling pathway	9/167	138/8076	0.002185886	0.071509698	0.063439999	ADCY5/KCNJ3/KRT13/KRT31/KRT33A/KRT23/KRT20/CREB3L3/KRT40	9
KEGG	hsa00053	Ascorbate and aldarate metabolism	4/167	30/8076	0.003176995	0.090941486	0.080678956	UGT2B4/UGT2B10/UGT2B11/UGT1A8	4
