# Supplementary material for: Novel Circulating Tumour Cell-Related Risk Model Indicates Prognosis and Immune Infiltration in Lung Adenocarcinoma
Source: J Immunol Res. 2022 May 29;2022:6521290. doi: 10.1155/2022/6521290 (PMC9168189; doi:10.1155/2022/6521290)
Supplement: Supplementary Materials — The following are the supplementary material to this article: Supplementary Data 1: Data for Figure 3(f) heat map. Supplementary Data 2: Data for Figure 6(a) volcano plot. Supplementary Data 3: Data for Figure 6(b), S6 GO and KEGG. Supplementary Data 4: Data for Figure 6(c) circle diagram. Supplementary Figures: Supplementary Figure S1: The cluster tree shows the similarity between 22 DEGs. Supplementary Figure S2: KM curve displays the survival possibility for the 4 candidate genes' low and high expression groups. Supplementary Figure S3: ROC curve considered risk score and other prognostic factors in TCGA-LUAD data. Supplementary Figure S4: Unsupervised clustering of 4 DEGs expressions in GSE72094 (A) and GSE42127 (B), while the tumor stage, smoking history, and risk score are used as patient annotations. Supplementary Figure S5: Validation of the CTCR Model in the GSE42127 dataset (n = 132). Supplementary Figure S6: Bar chart derived from KEGG analysis. Supplementary Figure S7: The immune cell infiltration landscape in GSE42127 dataset (n = 132). [file 6521290.f1.zip › Supplementary Data 4_data for circle diagram.txt]

pathway	number	P	genes
Staphylococcus aureus infection	14	1.9073E-06	C5/DEFA3/DEFA5/DEFB4A/FCAR/FCGR3B/FGG/FPR2/KRT13/KRT31/KRT33A/KRT23/KRT20/KRT40
Neuroactive ligand-receptor interaction	23	5.14104E-05	AGT/C5/CALCA/CALCB/F2/FPR2/GABRA1/GABRA2/GALR1/GCG/GNRH2/PRLHR/KNG1/MTNR1B/NPY/NTSR1/PTGFR/SST/TAC1/GLP2R/HRH3/CHRNA9/TAAR1
Maturity onset diabetes of the young	7	5.14104E-05	NEUROD1/NKX2-2/PAX4/SLC2A2/HNF1A/NEUROG3/RFX6
IL-17 signaling pathway	10	0.001265813	CSF3/DEFB4A/CXCL1/IL1B/S100A7/S100A8/CXCL5/TNF/IL17C/S100A7A
Complement and coagulation cascades	9	0.002733405	C5/C8A/C8B/F2/FGA/FGB/FGG/KNG1/VTN
Viral protein interaction with cytokine and cytokine receptor	8	0.039940466	CXCL1/CXCR1/CXCR2/PF4V1/PPBP/CCL24/CXCL5/TNF
Estrogen signaling pathway	9	0.071509698	ADCY5/KCNJ3/KRT13/KRT31/KRT33A/KRT23/KRT20/CREB3L3/KRT40
Ascorbate and aldarate metabolism	4	0.090941486	UGT2B4/UGT2B10/UGT2B11/UGT1A8
